# Supplementary material for: Nickel-catalyzed decyanation of inert carbon–cyano bonds
Source: Royal Society of Chemistry journal article supplement (doi:10.1039/c2cc36883h), 2012-11-06

*Supporting Information*

**Nickel-Catalyzed Decyanation of Inert Carbon-Cyano Bonds**

Tuhin Patra, Soumitra Agasti, Akanksha and Debabrata Maiti\*

*Department of Chemistry, Indian Institute of Technology Bombay,*

*Powai, Mumbai 400076*

E-mail: [dmaiti@chem.iitb.ac.in](mailto:dmaiti@chem.iitb.ac.in)

**2-(3-Phenyl-1H-pyrazol-1-yl)benzonitrile**  
(Table 2, entry 2b-SM) <sup>1</sup>H-NMR

7.74  
7.73  
7.72  
7.71  
7.69  
7.68  
7.67  
7.66  
7.65  
7.64  
7.63  
7.62  
7.61  
7.60  
7.59  
7.58  
7.57  
7.56  
7.55  
7.54  
7.53  
7.52  
7.51  
7.50  
7.49  
7.48  
7.47  
7.46  
7.45  
7.44  
7.43  
7.42  
7.41  
7.40  
7.39  
7.38  
7.37  
7.36  
7.35  
7.34  
7.33  
7.32  
7.31  
7.30  
7.29  
7.28  
7.27  
7.26  
7.25  
7.24  
7.23  
7.22  
7.21  
7.20  
7.19  
7.18  
7.17  
7.16  
7.15  
7.14  
7.13  
7.12  
7.11  
7.10  
7.09  
7.08  
7.07  
7.06  
7.05  
7.04  
7.03  
7.02  
7.01  
7.00  
6.99  
6.98  
6.97  
6.96  
6.95  
6.94  
6.93  
6.92  
6.91  
6.90  
6.89  
6.88  
6.87  
6.86  
6.85  
6.84  
6.83  
6.82  
6.81  
6.80  
6.79  
6.78  
6.77  
6.76  
6.75  
6.74  
6.73  
6.72  
6.71  
6.70  
6.69  
6.68  
6.67  
6.66  
6.65  
6.64  
6.63  
6.62  
6.61  
6.60  
6.59  
6.58  
6.57  
6.56  
6.55  
6.54  
6.53  
6.52  
6.51  
6.50  
6.49  
6.48  
6.47  
6.46  
6.45  
6.44  
6.43  
6.42  
6.41  
6.40  
6.39  
6.38  
6.37  
6.36  
6.35  
6.34  
6.33  
6.32  
6.31  
6.30  
6.29  
6.28  
6.27  
6.26  
6.25  
6.24  
6.23  
6.22  
6.21  
6.20  
6.19  
6.18  
6.17  
6.16  
6.15  
6.14  
6.13  
6.12  
6.11  
6.10  
6.09  
6.08  
6.07  
6.06  
6.05  
6.04  
6.03  
6.02  
6.01  
6.00  
5.99  
5.98  
5.97  
5.96  
5.95  
5.94  
5.93  
5.92  
5.91  
5.90  
5.89  
5.88  
5.87  
5.86  
5.85  
5.84  
5.83  
5.82  
5.81  
5.80  
5.79  
5.78  
5.77  
5.76  
5.75  
5.74  
5.73  
5.72  
5.71  
5.70  
5.69  
5.68  
5.67  
5.66  
5.65  
5.64  
5.63  
5.62  
5.61  
5.60  
5.59  
5.58  
5.57  
5.56  
5.55  
5.54  
5.53  
5.52  
5.51  
5.50  
5.49  
5.48  
5.47  
5.46  
5.45  
5.44  
5.43  
5.42  
5.41  
5.40  
5.39  
5.38  
5.37  
5.36  
5.35  
5.34  
5.33  
5.32  
5.31  
5.30  
5.29  
5.28  
5.27  
5.26  
5.25  
5.24  
5.23  
5.22  
5.21  
5.20  
5.19  
5.18  
5.17  
5.16  
5.15  
5.14  
5.13  
5.12  
5.11  
5.10  
5.09  
5.08  
5.07  
5.06  
5.05  
5.04  
5.03  
5.02  
5.01  
5.00  
4.99  
4.98  
4.97  
4.96  
4.95  
4.94  
4.93  
4.92  
4.91  
4.90  
4.89  
4.88  
4.87  
4.86  
4.85  
4.84  
4.83  
4.82  
4.81  
4.80  
4.79  
4.78  
4.77  
4.76  
4.75  
4.74  
4.73  
4.72  
4.71  
4.70  
4.69  
4.68  
4.67  
4.66  
4.65  
4.64  
4.63  
4.62  
4.61  
4.60  
4.59  
4.58  
4.57  
4.56  
4.55  
4.54  
4.53  
4.52  
4.51  
4.50  
4.49  
4.48  
4.47  
4.46  
4.45  
4.44  
4.43  
4.42  
4.41  
4.40  
4.39  
4.38  
4.37  
4.36  
4.35  
4.34  
4.33  
4.32  
4.31  
4.30  
4.29  
4.28  
4.27  
4.26  
4.25  
4.24  
4.23  
4.22  
4.21  
4.20  
4.19  
4.18  
4.17  
4.16  
4.15  
4.14  
4.13  
4.12  
4.11  
4.10  
4.09  
4.08  
4.07  
4.06  
4.05  
4.04  
4.03  
4.02  
4.01  
4.00  
3.99  
3.98  
3.97  
3.96  
3.95  
3.94  
3.93  
3.92  
3.91  
3.90  
3.89  
3.88  
3.87  
3.86  
3.85  
3.84  
3.83  
3.82  
3.81  
3.80  
3.79  
3.78  
3.77  
3.76  
3.75  
3.74  
3.73  
3.72  
3.71  
3.70  
3.69  
3.68  
3.67  
3.66  
3.65  
3.64  
3.63  
3.62  
3.61  
3.60  
3.59  
3.58  
3.57  
3.56  
3.55  
3.54  
3.53  
3.52  
3.51  
3.50  
3.49  
3.48  
3.47  
3.46  
3.45  
3.44  
3.43  
3.42  
3.41  
3.40  
3.39  
3.38  
3.37  
3.36  
3.35  
3.34  
3.33  
3.32  
3.31  
3.30  
3.29  
3.28  
3.27  
3.26  
3.25  
3.24  
3.23  
3.22  
3.21  
3.20  
3.19  
3.18  
3.17  
3.16  
3.15  
3.14  
3.13  
3.12  
3.11  
3.10  
3.09  
3.08  
3.07  
3.06  
3.05  
3.04  
3.03  
3.02  
3.01  
3.00  
2.99  
2.98  
2.97  
2.96  
2.95  
2.94  
2.93  
2.92  
2.91  
2.90  
2.89  
2.88  
2.87  
2.86  
2.85  
2.84  
2.83  
2.82  
2.81  
2.80  
2.79  
2.78  
2.77  
2.76  
2.75  
2.74  
2.73  
2.72  
2.71  
2.70  
2.69  
2.68  
2.67  
2.66  
2.65  
2.64  
2.63  
2.62  
2.61  
2.60  
2.59  
2.58  
2.57  
2.56  
2.55  
2.54  
2.53  
2.52  
2.51  
2.50  
2.49  
2.48  
2.47  
2.46  
2.45  
2.44  
2.43  
2.42  
2.41  
2.40  
2.39  
2.38  
2.37  
2.36  
2.35  
2.34  
2.33  
2.32  
2.31  
2.30  
2.29  
2.28  
2.27  
2.26  
2.25  
2.24  
2.23  
2.22  
2.21  
2.20  
2.19  
2.18  
2.17  
2.16  
2.15  
2.14  
2.13  
2.12  
2.11  
2.10  
2.09  
2.08  
2.07  
2.06  
2.05  
2.04  
2.03  
2.02  
2.01  
2.00  
1.99  
1.98  
1.97  
1.96  
1.95  
1.94  
1.93  
1.92  
1.91  
1.90  
1.89  
1.88  
1.87  
1.86  
1.85  
1.84  
1.83  
1.82  
1.81  
1.80  
1.79  
1.78  
1.77  
1.76  
1.75  
1.74  
1.73  
1.72  
1.71  
1.70  
1.69  
1.68  
1.67  
1.66  
1.65  
1.64  
1.63  
1.62  
1.61  
1.60  
1.59  
1.58  
1.57  
1.56  
1.55  
1.54  
1.53  
1.52  
1.51  
1.50  
1.49  
1.48  
1.47  
1.46  
1.45  
1.44  
1.43  
1.42  
1.41  
1.40  
1.39  
1.38  
1.37  
1.36  
1.35  
1.34  
1.33  
1.32  
1.31  
1.30  
1.29  
1.28  
1.27  
1.26  
1.25  
1.24  
1.23  
1.22  
1.21  
1.20  
1.19  
1.18  
1.17  
1.16  
1.15  
1.14  
1.13  
1.12  
1.11  
1.10  
1.09  
1.08  
1.07  
1.06  
1.05  
1.04  
1.03  
1.02  
1.01  
1.00  
0.99  
0.98  
0.97  
0.96  
0.95  
0.94  
0.93  
0.92  
0.91  
0.90  
0.89  
0.88  
0.87  
0.86  
0.85  
0.84  
0.83  
0.82  
0.81  
0.80  
0.79  
0.78  
0.77  
0.76  
0.75  
0.74  
0.73  
0.72  
0.71  
0.70  
0.69  
0.68  
0.67  
0.66  
0.65  
0.64  
0.63  
0.62  
0.61  
0.60  
0.59  
0.58  
0.57  
0.56  
0.55  
0.54  
0.53  
0.52  
0.51  
0.50  
0.49  
0.48  
0.47  
0.46  
0.45  
0.44  
0.43  
0.42  
0.41  
0.40  
0.39  
0.38  
0.37  
0.36  
0.35  
0.34  
0.33  
0.32  
0.31  
0.30  
0.29  
0.28  
0.27  
0.26  
0.25  
0.24  
0.23  
0.22  
0.21  
0.20  
0.19  
0.18  
0.17  
0.16  
0.15  
0.14  
0.13  
0.12  
0.11  
0.10  
0.09  
0.08  
0.07  
0.06  
0.05  
0.04  
0.03  
0.02  
0.01  
0.00  
-0.01  
-0.02  
-0.03  
-0.04  
-0.05  
-0.06  
-0.07  
-0.08  
-0.09  
-0.10  
-0.11  
-0.12  
-0.13  
-0.14  
-0.15  
-0.16  
-0.17  
-0.18  
-0.19  
-0.20  
-0.21  
-0.22  
-0.23  
-0.24  
-0.25  
-0.26  
-0.27  
-0.28  
-0.29  
-0.30  
-0.31  
-0.32  
-0.33  
-0.34  
-0.35  
-0.36  
-0.37  
-0.38  
-0.39  
-0.40  
-0.41  
-0.42  
-0.43  
-0.44  
-0.45  
-0.46  
-0.47  
-0.48  
-0.49  
-0.50  
-0.51  
-0.52  
-0.53  
-0.54  
-0.55  
-0.56  
-0.57  
-0.58  
-0.59  
-0.60  
-0.61  
-0.62  
-0.63  
-0.64  
-0.65  
-0.66  
-0.67  
-0.68  
-0.69  
-0.70  
-0.71  
-0.72  
-0.73  
-0.74  
-0.75  
-0.76  
-0.77  
-0.78  
-0.79  
-0.80  
-0.81  
-0.82  
-0.83  
-0.84  
-0.85  
-0.86  
-0.87  
-0.88  
-0.89  
-0.90  
-0.91  
-0.92  
-0.93  
-0.94  
-0.95  
-0.96  
-0.97  
-0.98  
-0.99  
-1.00

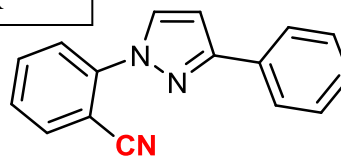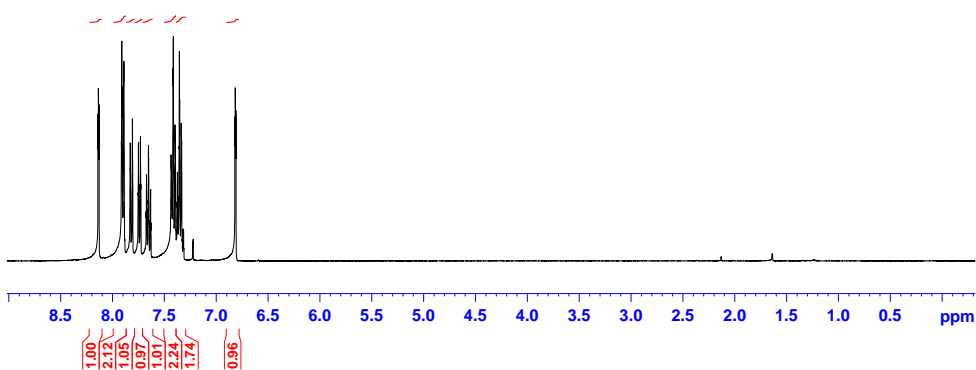

**2-(3-Phenyl-1H-pyrazol-1-yl)benzonitrile**  
(Table 2, entry 2b-SM) <sup>13</sup>C-NMR

154.20  
142.06  
134.84  
134.17  
130.94  
128.96  
128.71  
126.56  
123.79  
117.44  
106.22  
104.98  
77.61  
77.29  
76.97

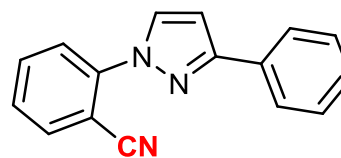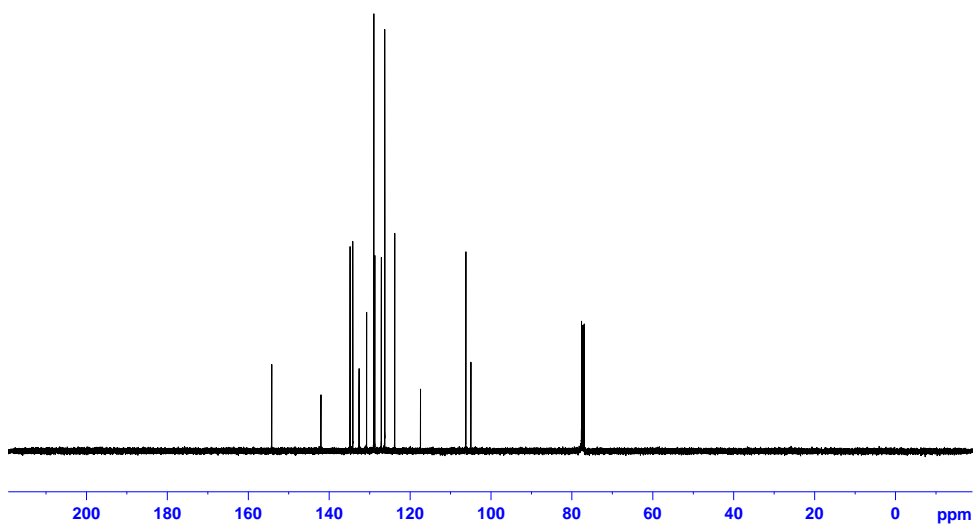

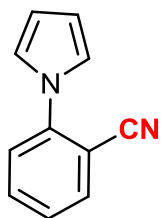

**2-(1H-Pyrrol-1-yl)benzonitrile**  
(Table 2, entry 2d-SM) <sup>1</sup>H-NMR

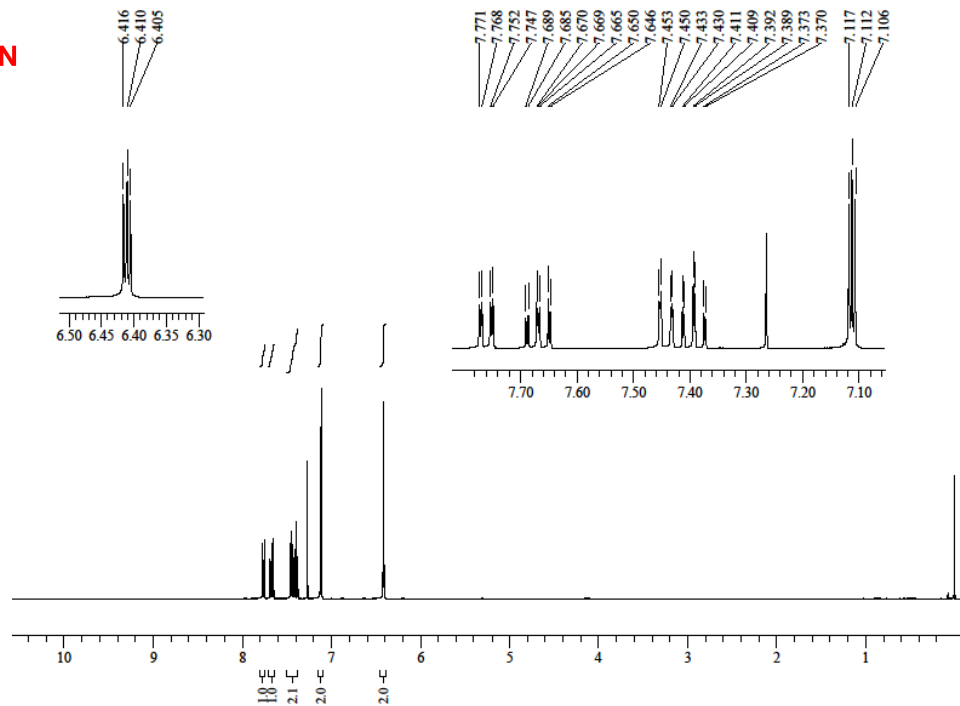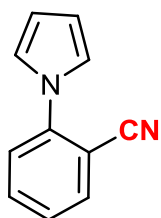

**2-(1H-Pyrrol-1-yl)benzonitrile**  
(Table 2, entry 2d-SM) <sup>13</sup>C-NMR

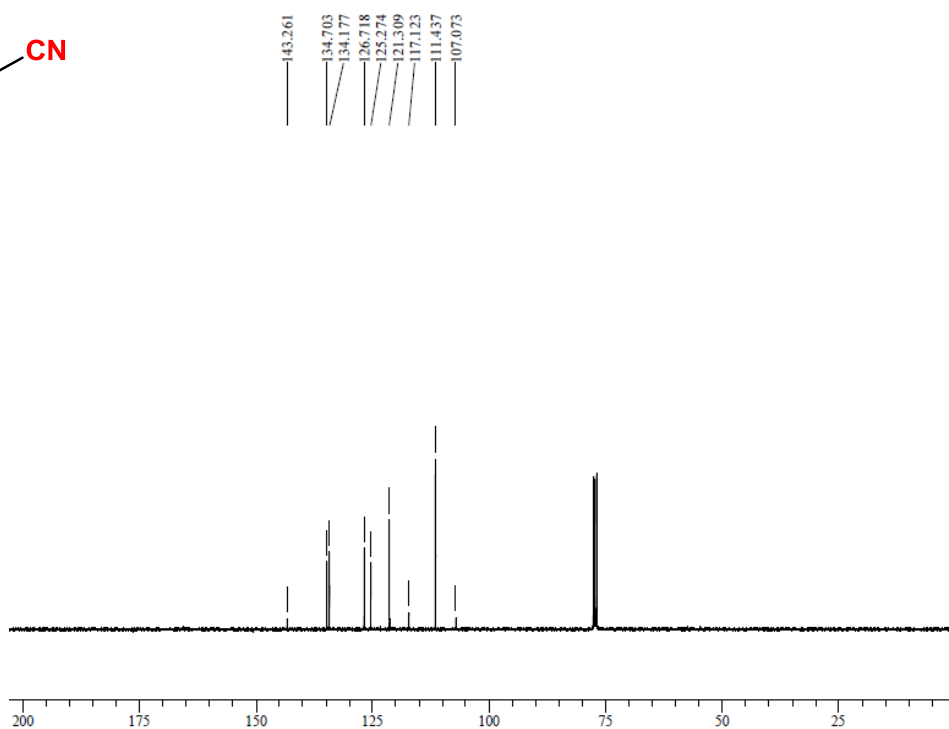

**2-(1*H*-Indol-1-yl)benzonitrile**  
(Table 2, entry 2e-SM) <sup>1</sup>H-NMR

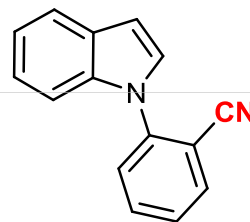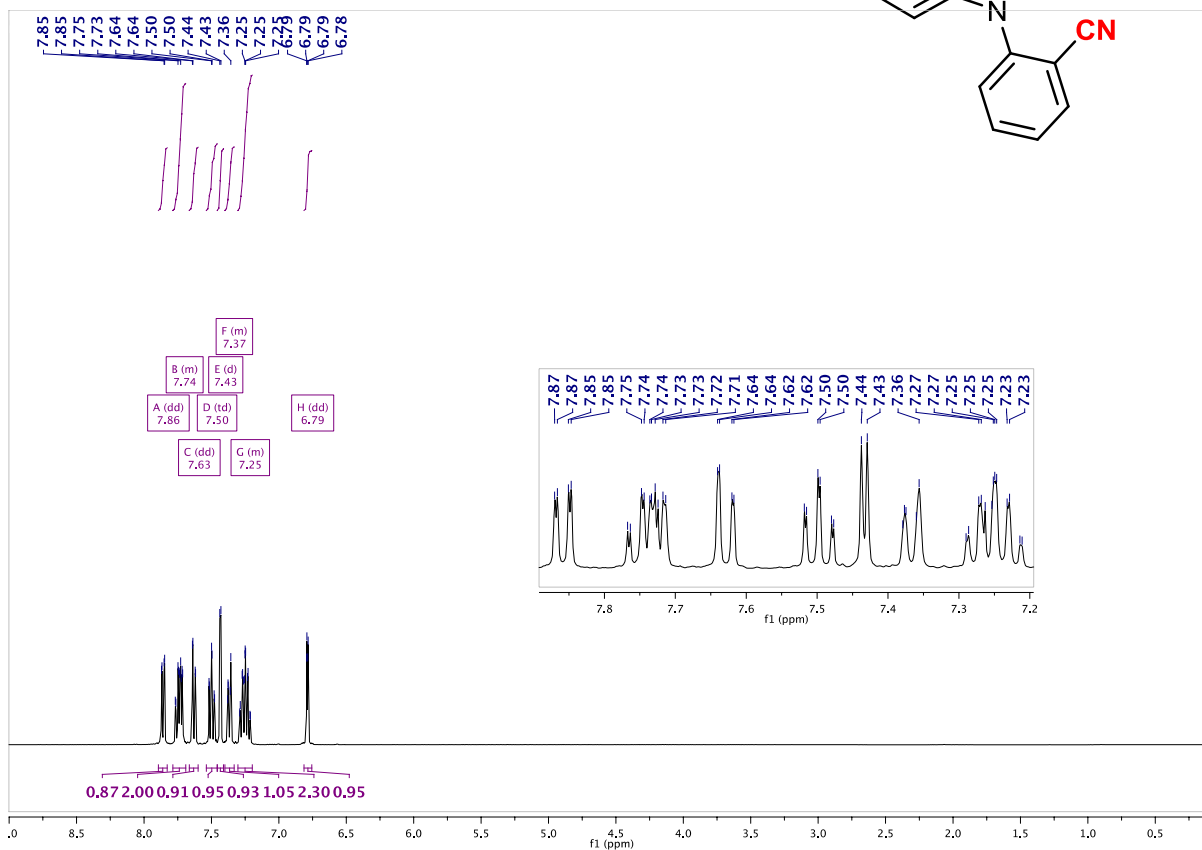

**2-(1*H*-Indol-1-yl)benzonitrile**  
(Table 2, entry 2e-SM) <sup>13</sup>C-NMR

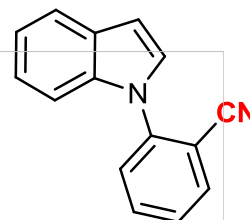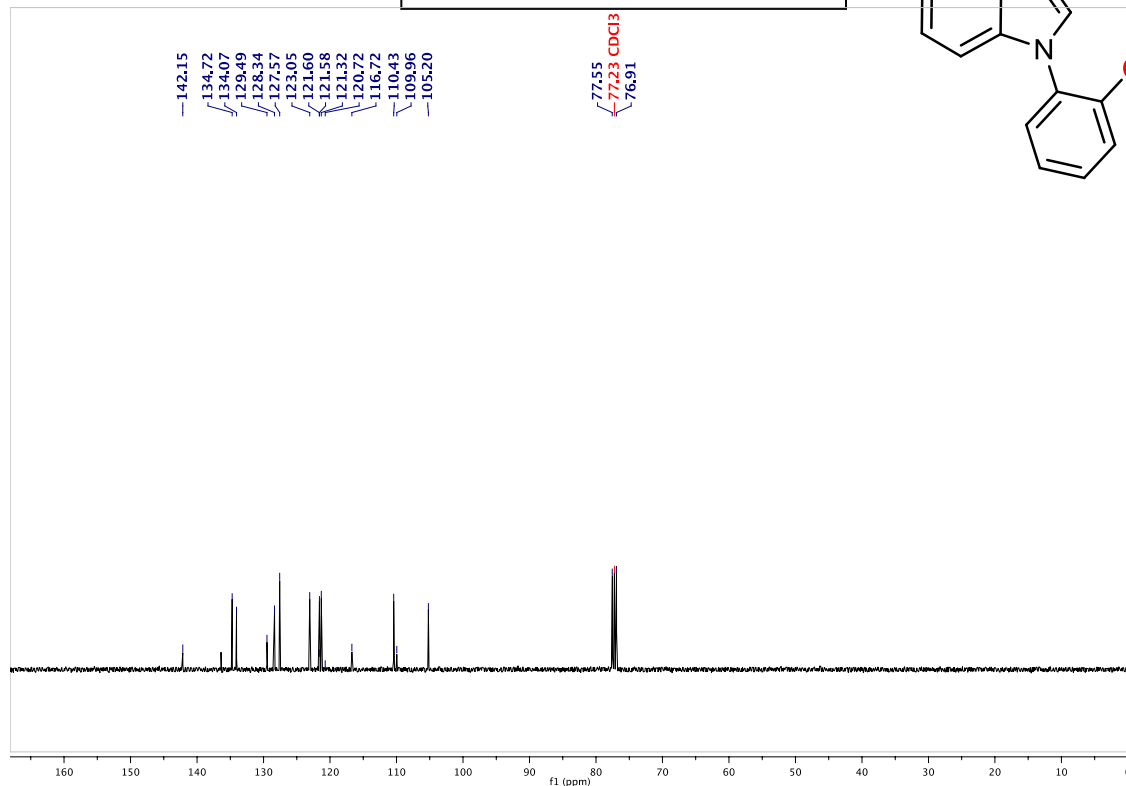

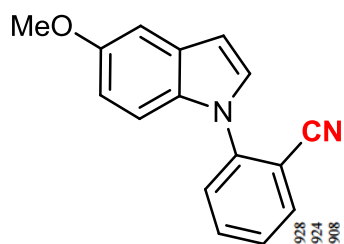

**2-(5-Methoxy-1H-indol-1-yl)benzotrile**  
(Table 2, entry 2f-SM) <sup>1</sup>H-NMR

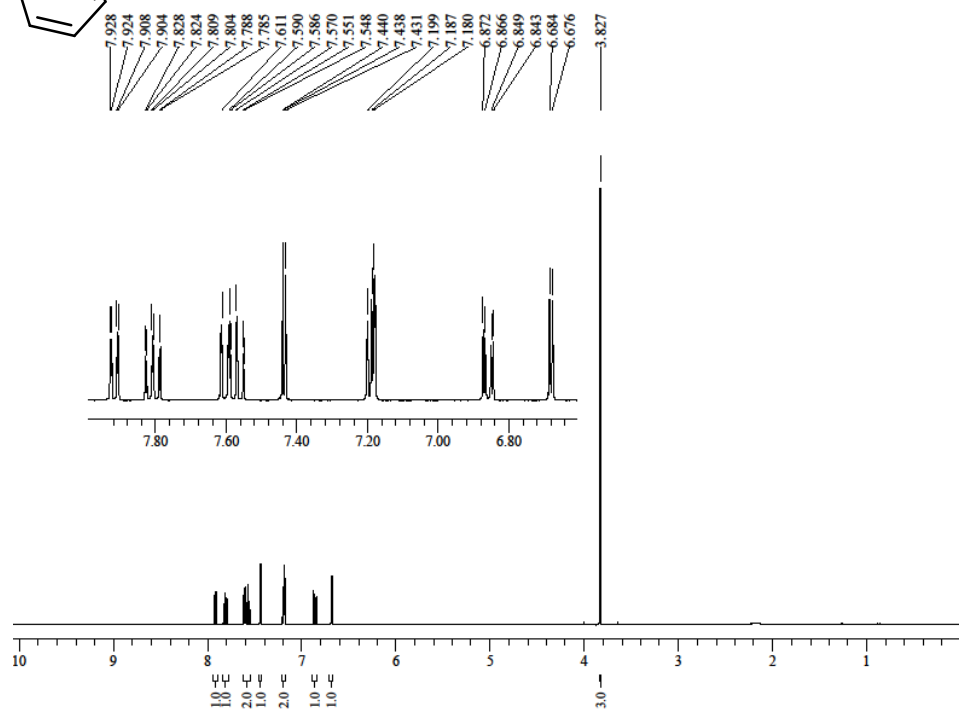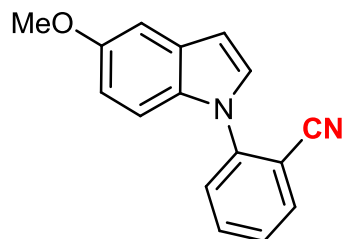

**2-(5-Methoxy-1H-indol-1-yl)benzotrile**  
(Table 2, entry 2f-SM) <sup>13</sup>C-NMR

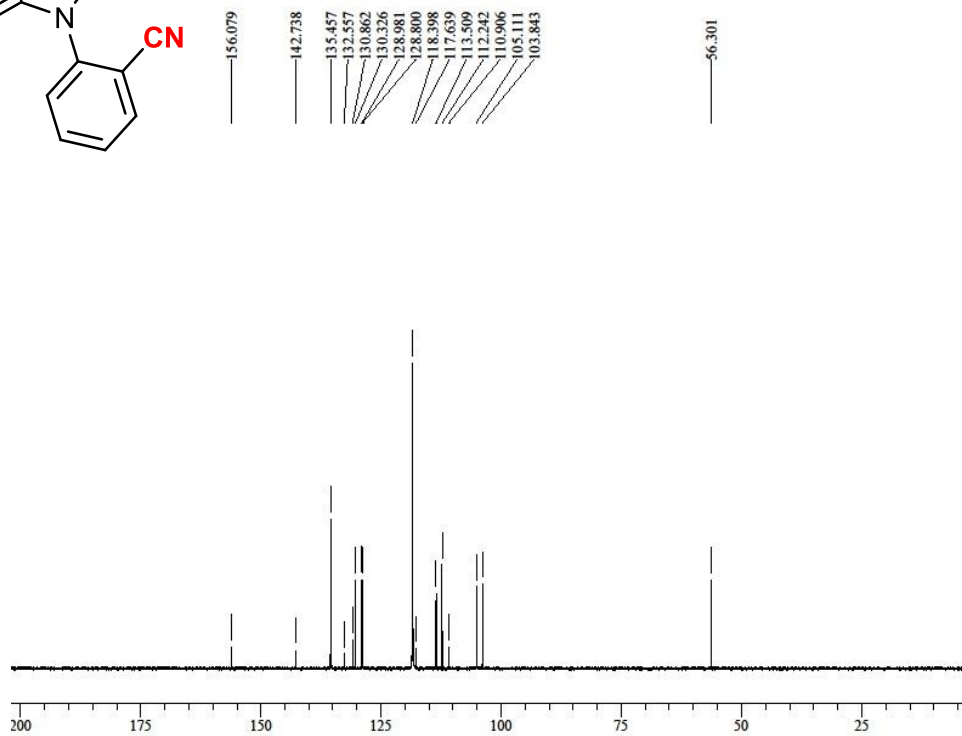

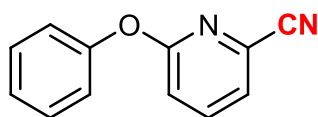

**6-Phenoxypicolinonitrile**  
(Table 2, entry 2c-SM) <sup>1</sup>H-NMR

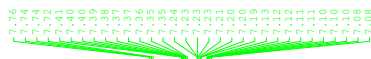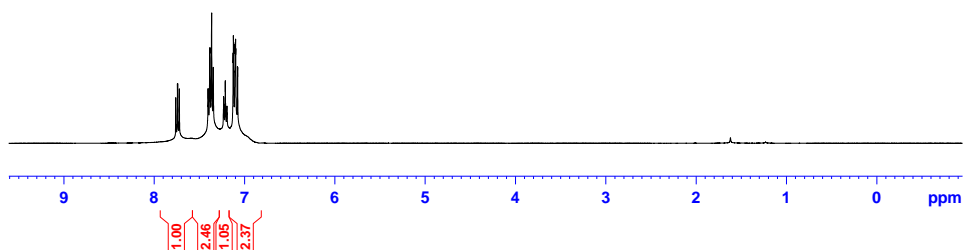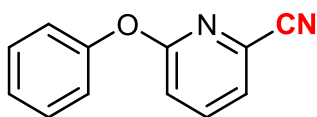

**6-Phenoxypicolinonitrile**  
(Table 2, entry 2c-SM) <sup>13</sup>C-NMR

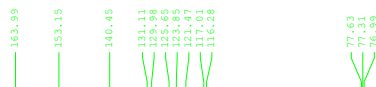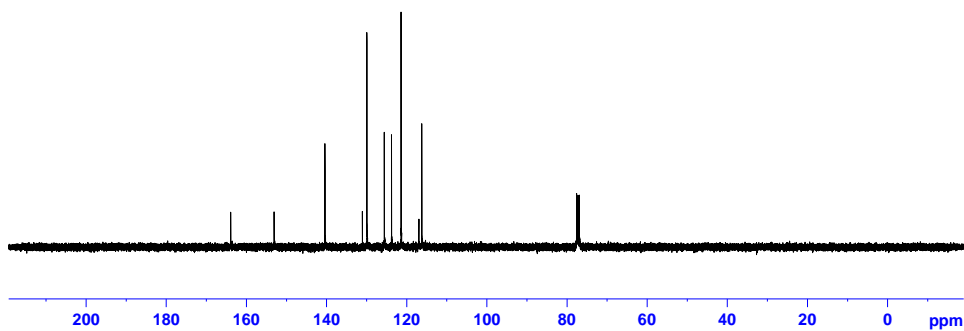

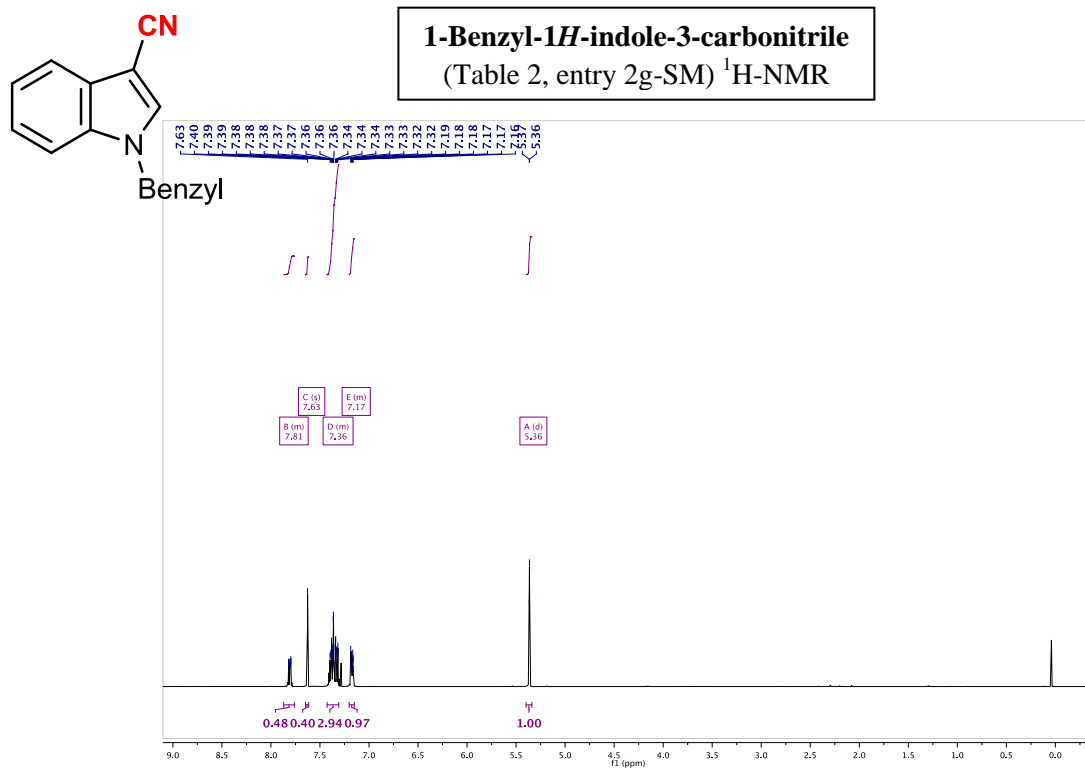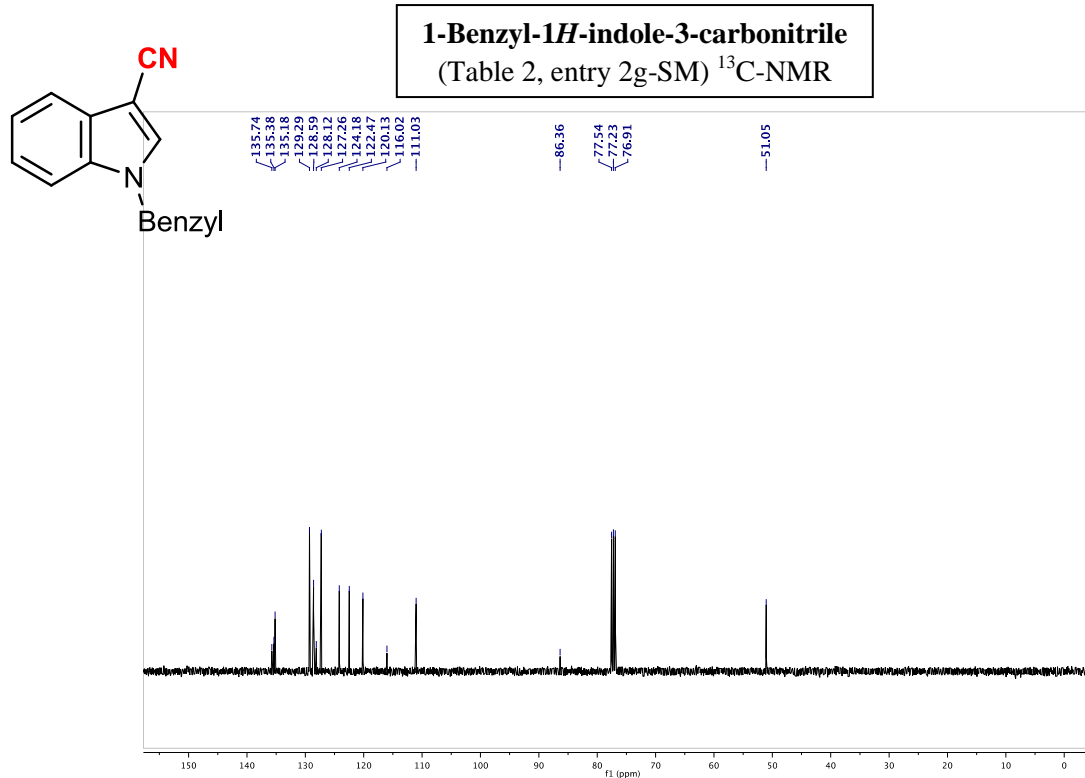

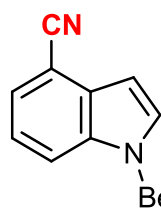

**1-Benzyl-1H-indole-4-carbonitrile**  
(Table 2, entry 2h-SM) <sup>1</sup>H-NMR

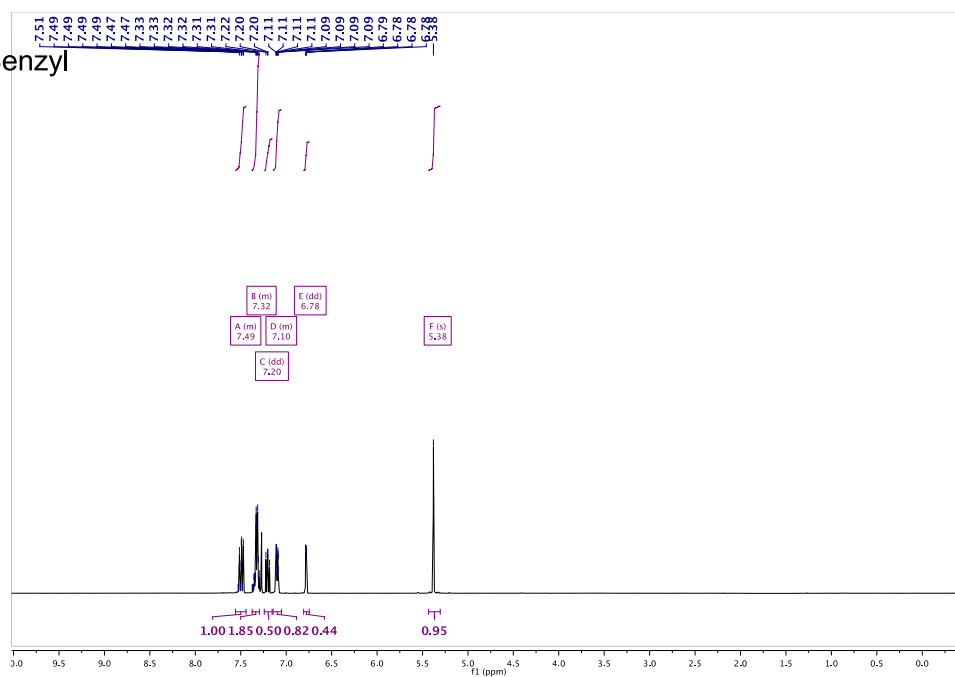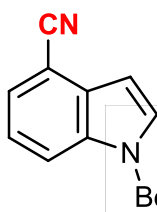

**1-Benzyl-1H-indole-4-carbonitrile**  
(Table 2, entry 2h-SM) <sup>13</sup>C-NMR

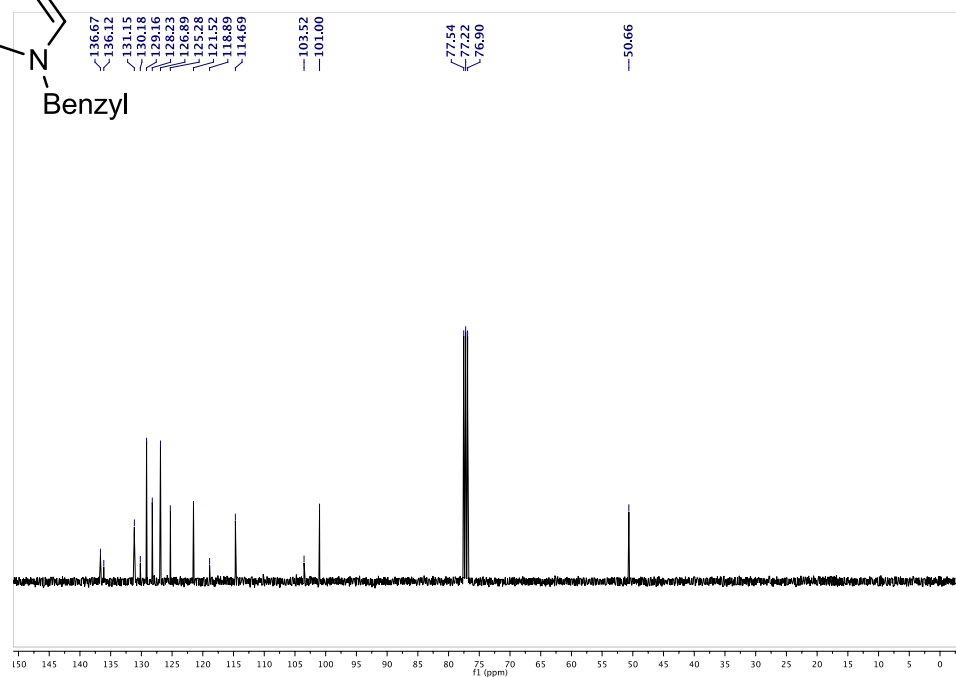



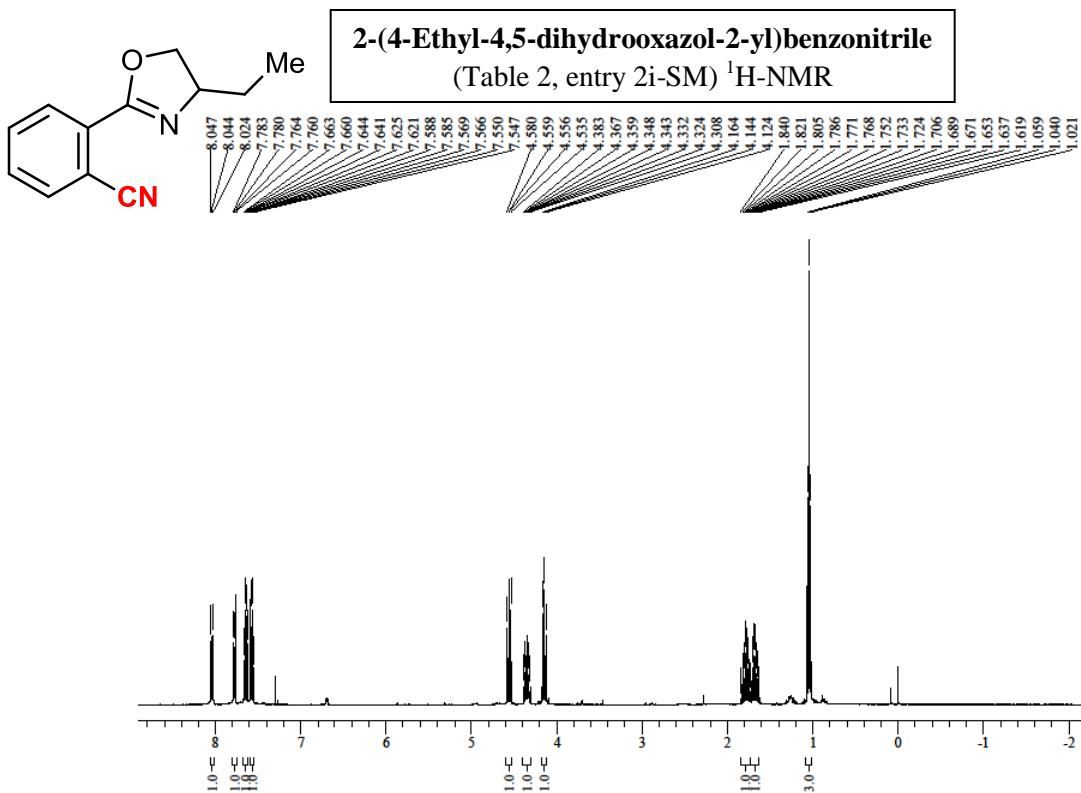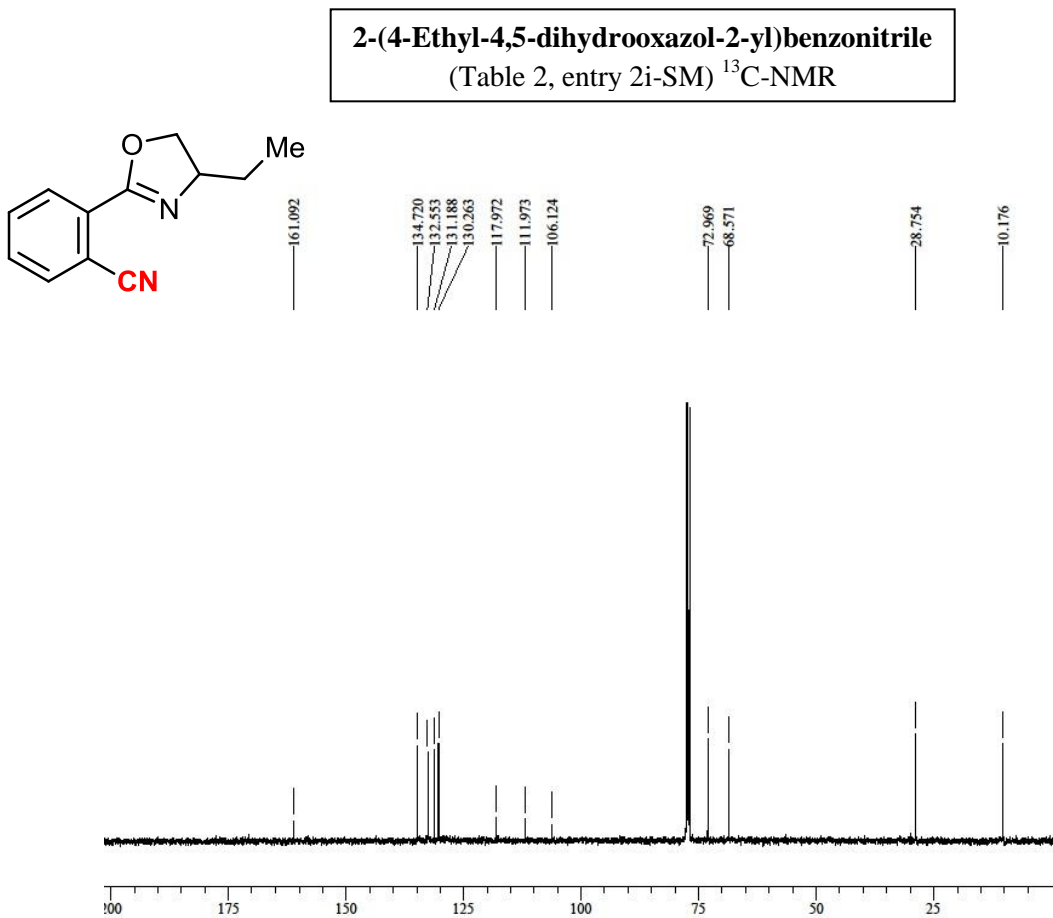

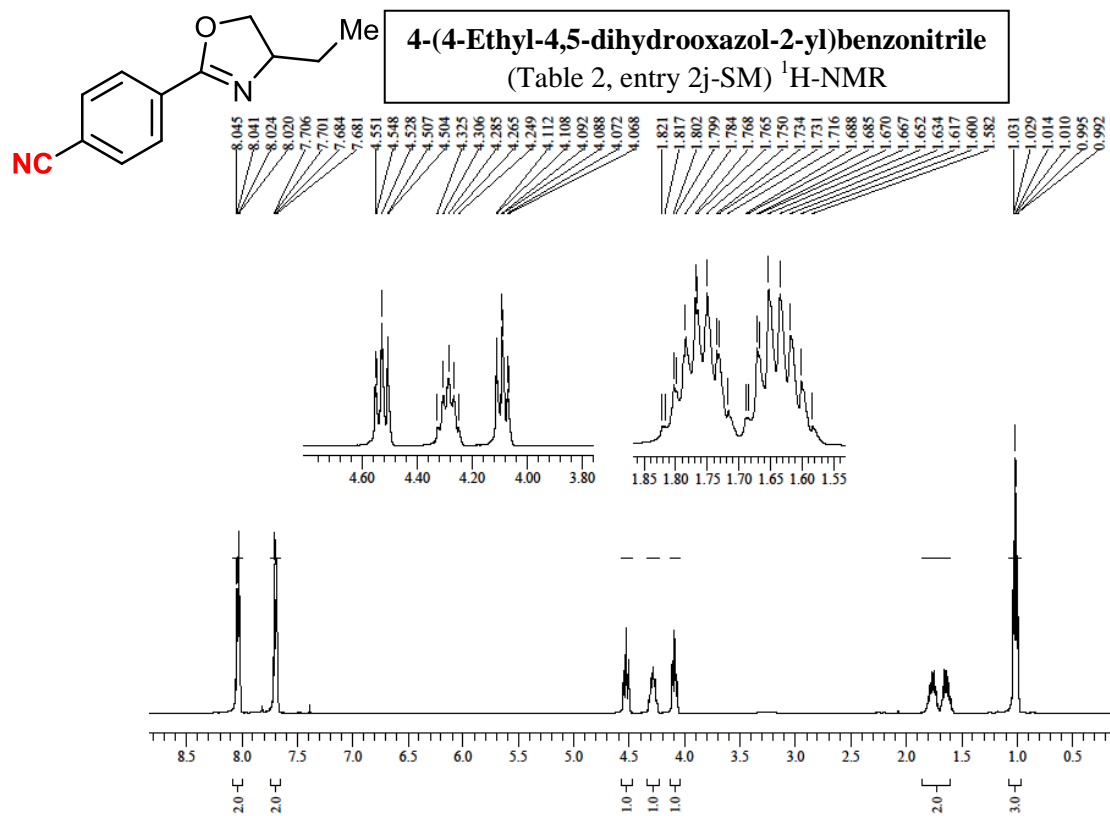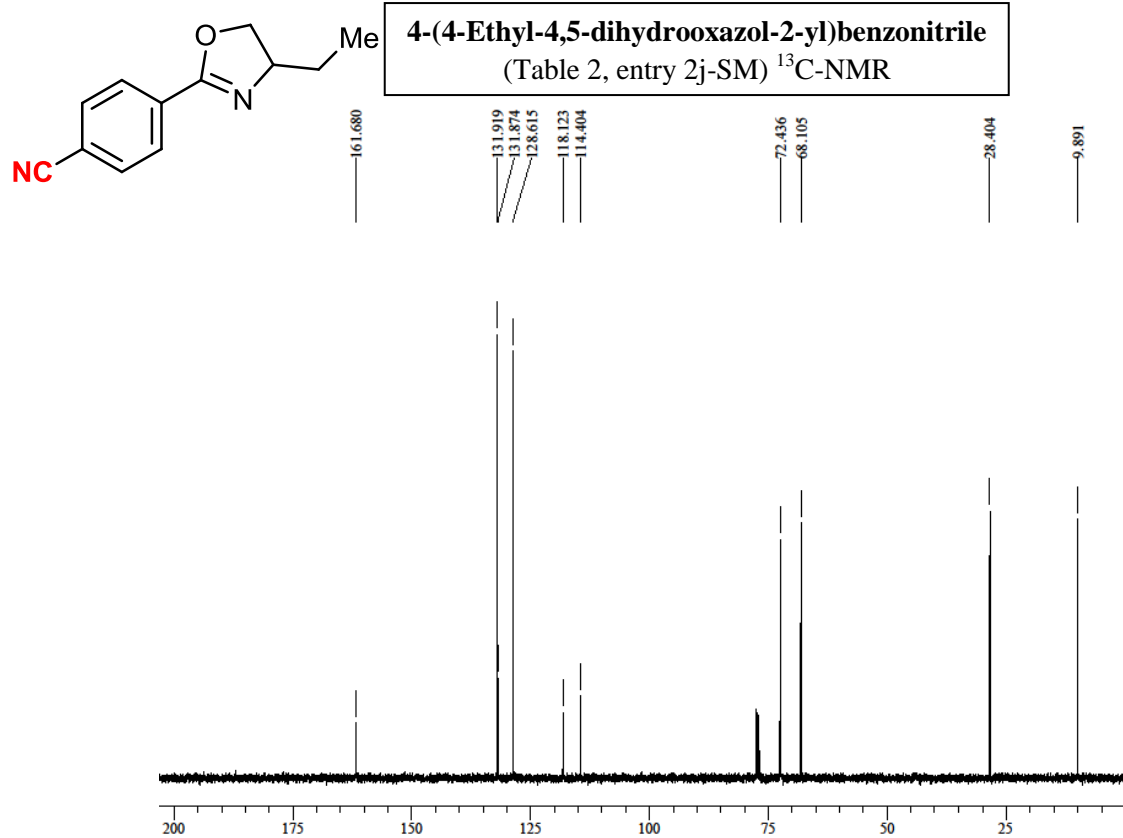

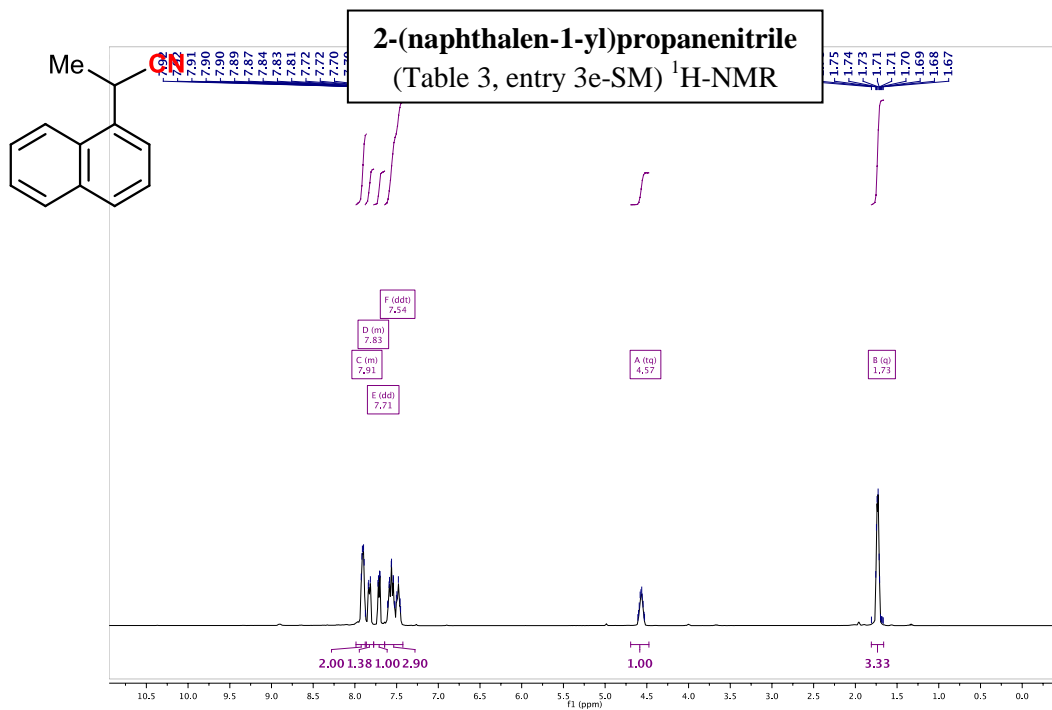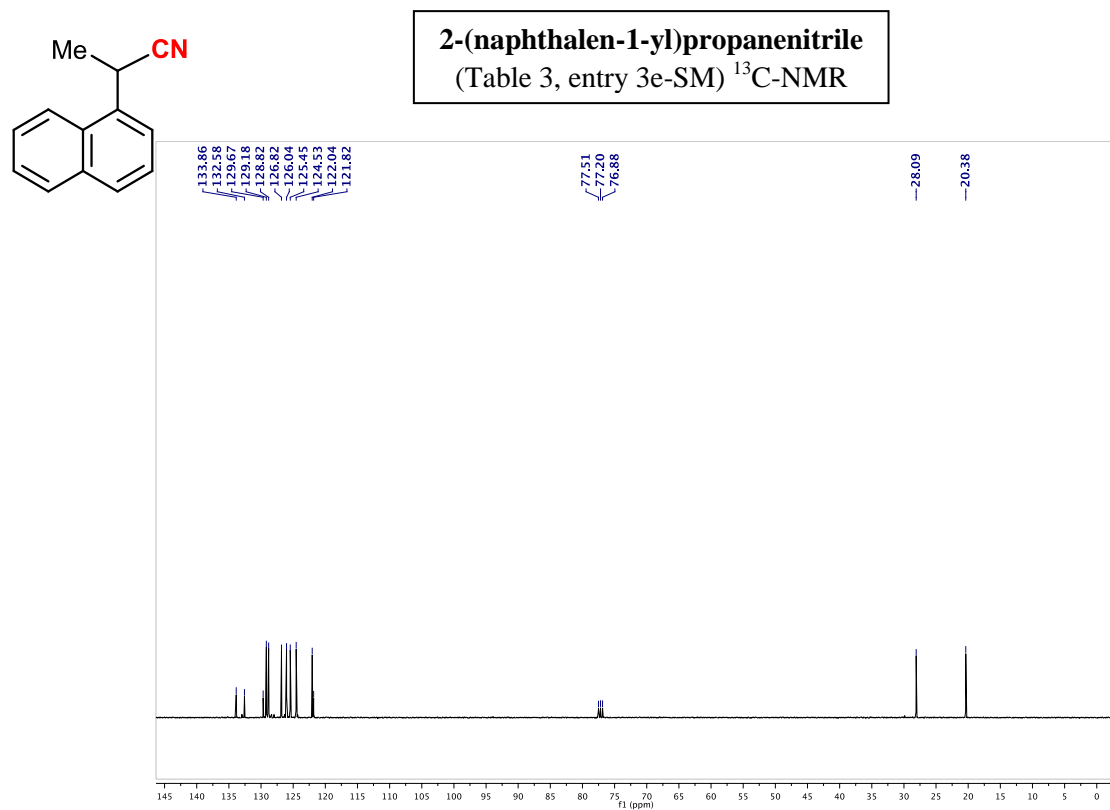

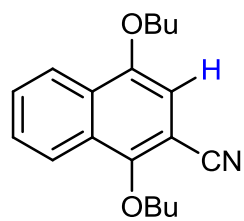

**1,4-Dibutoxy-2-naphthonitrile**  
 (Table 1, entry 1a)  $^{13}\text{C}$ -NMR

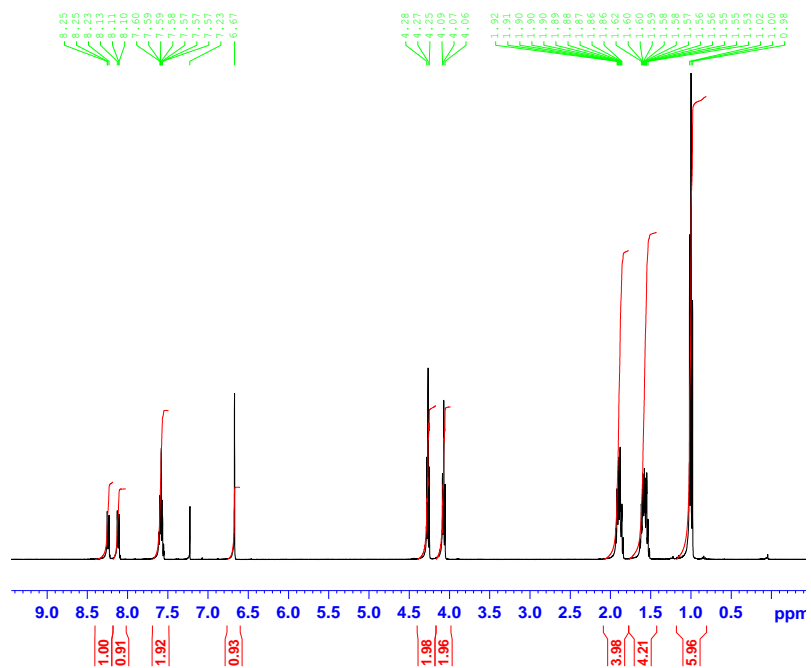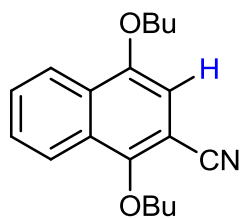

**1,4-Dibutoxy-2-naphthonitrile**  
 (Table 1, entry 1a)  $^1\text{H}$ -NMR

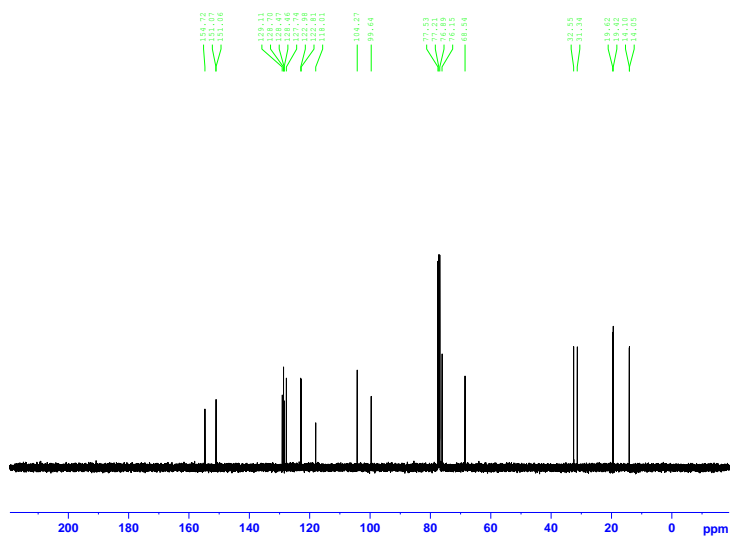

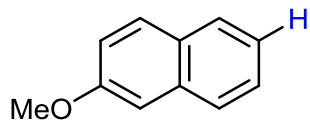

**2-Methoxynaphthalene**  
(Table 1, entry 1b)  $^1\text{H-NMR}$

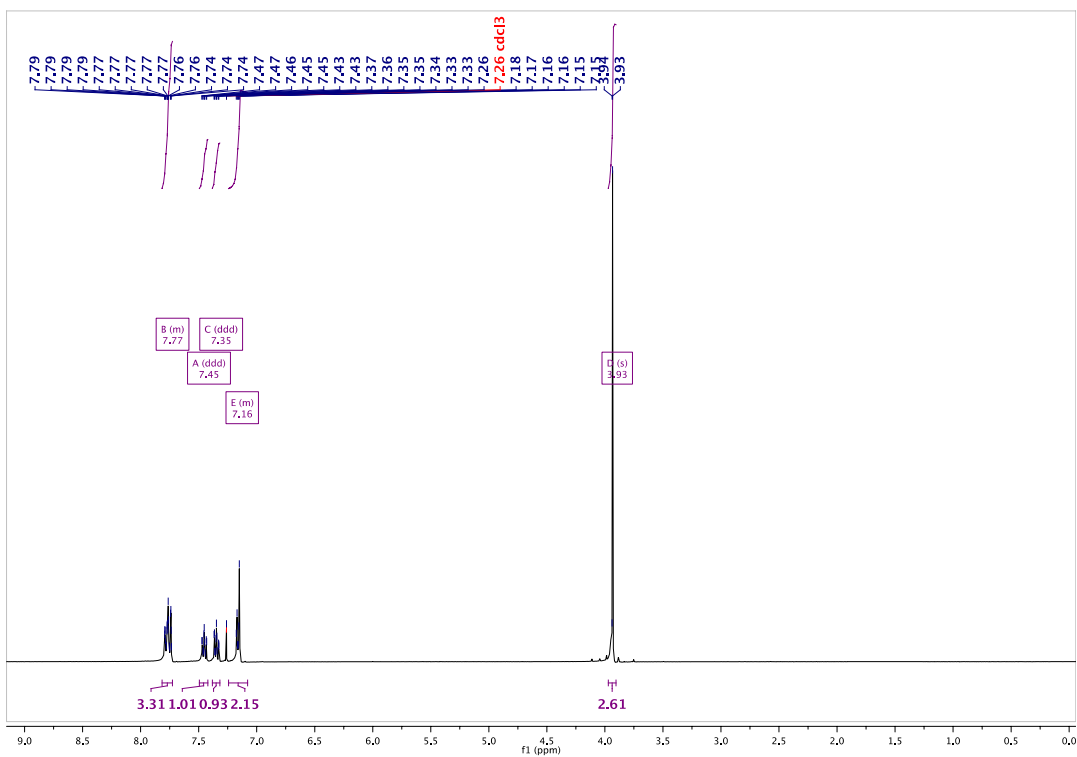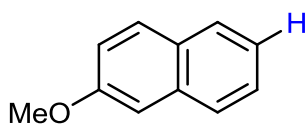

**2-Methoxynaphthalene**  
(Table 1, entry 1b)  $^{13}\text{C-NMR}$

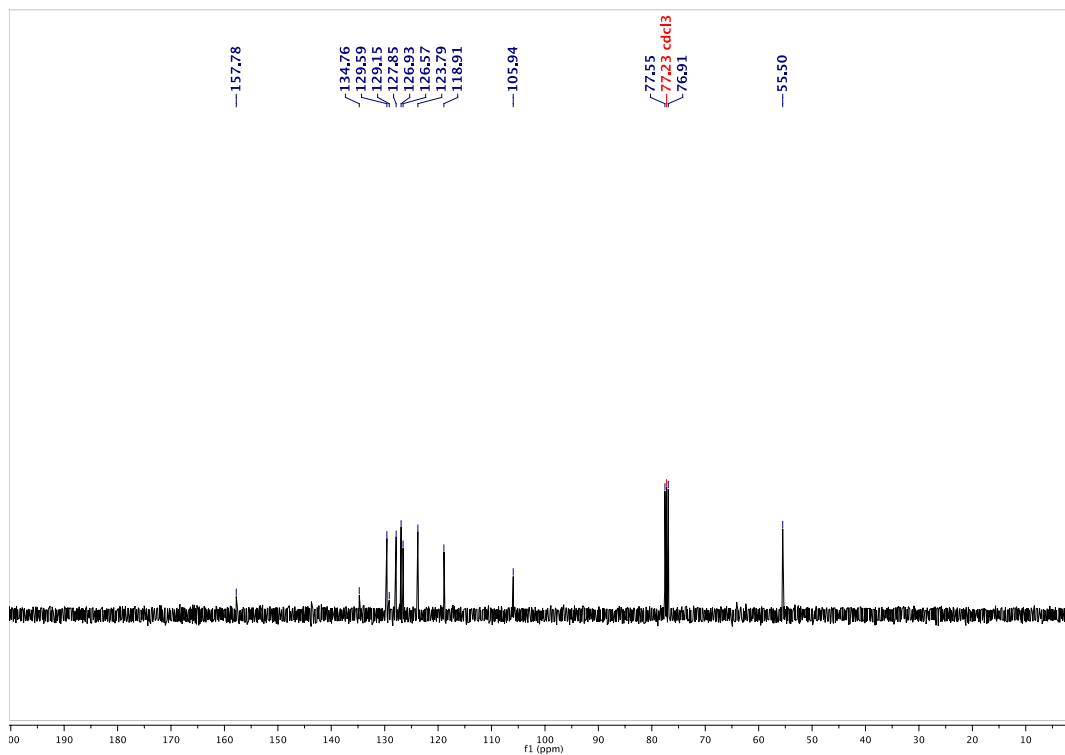

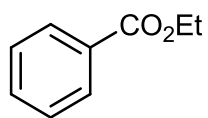

**Ethyl benzoate**  
(Table 1, entry 1c and 1h) <sup>1</sup>H-NMR

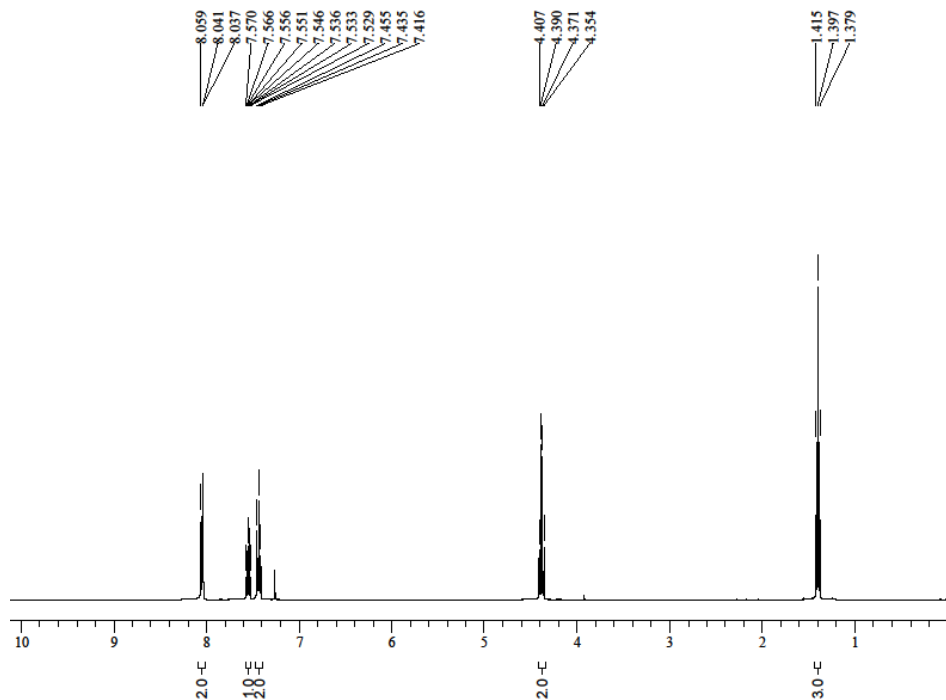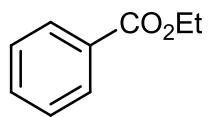

**Ethyl benzoate**  
(Table 1, entry 1c and 1h) <sup>13</sup>C-NMR

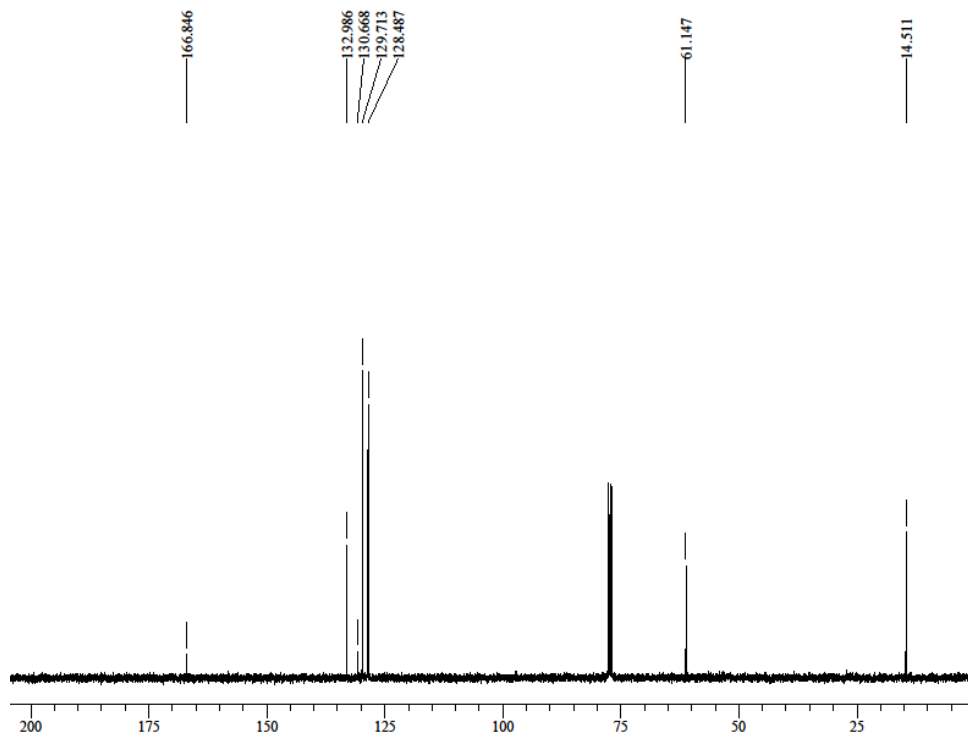

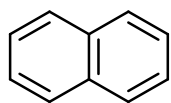

**Naphthalene**  
(Table 1, entry 1d and 1e) <sup>1</sup>H-NMR

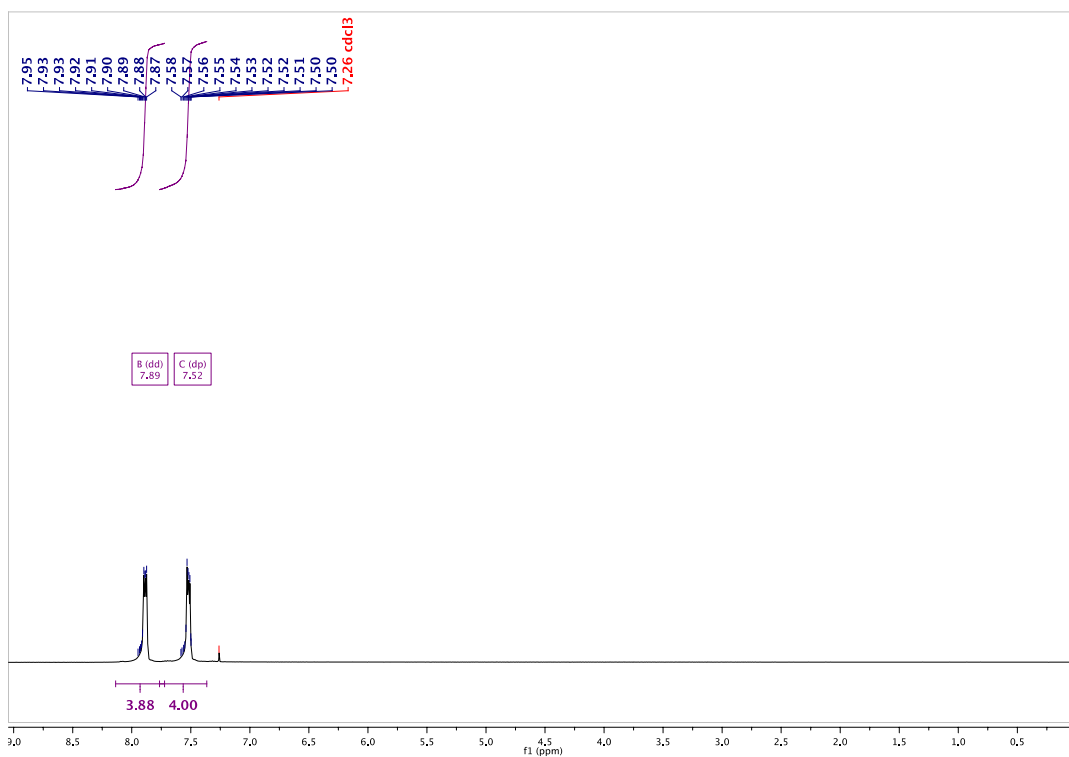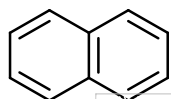

**Naphthalene**  
(Table 1, entry 1d and 1e) <sup>13</sup>C-NMR

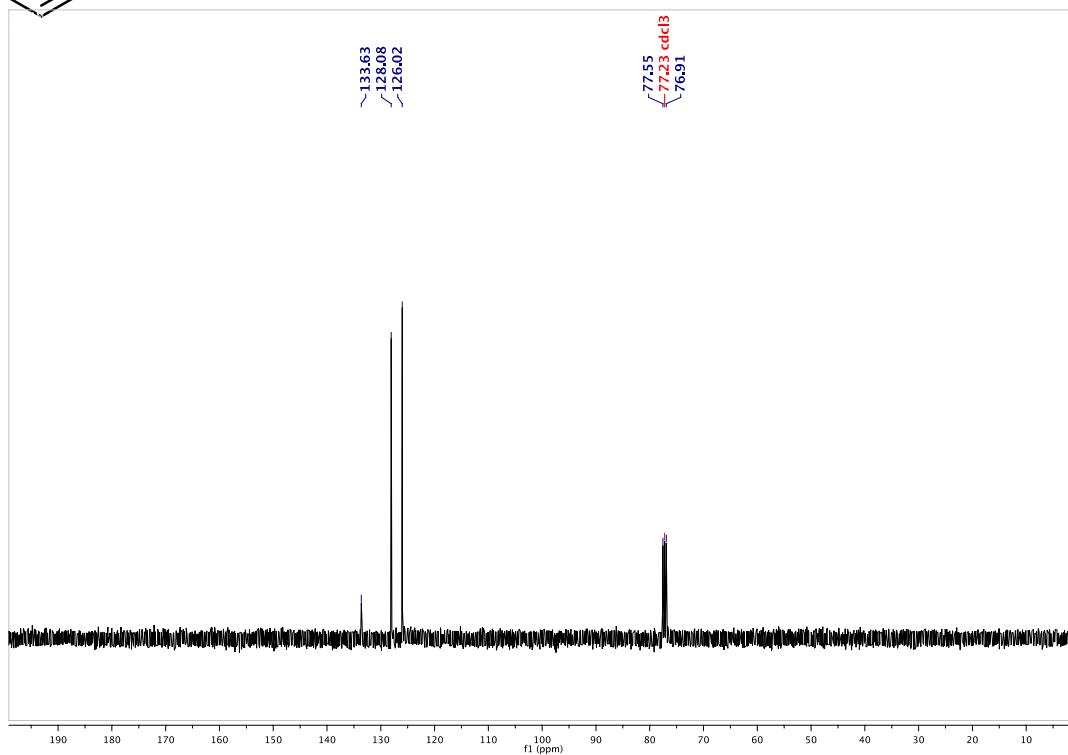

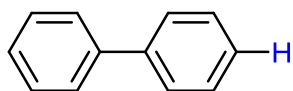

**Biphenyl**  
(Table 1, entry 1f) <sup>1</sup>H-NMR

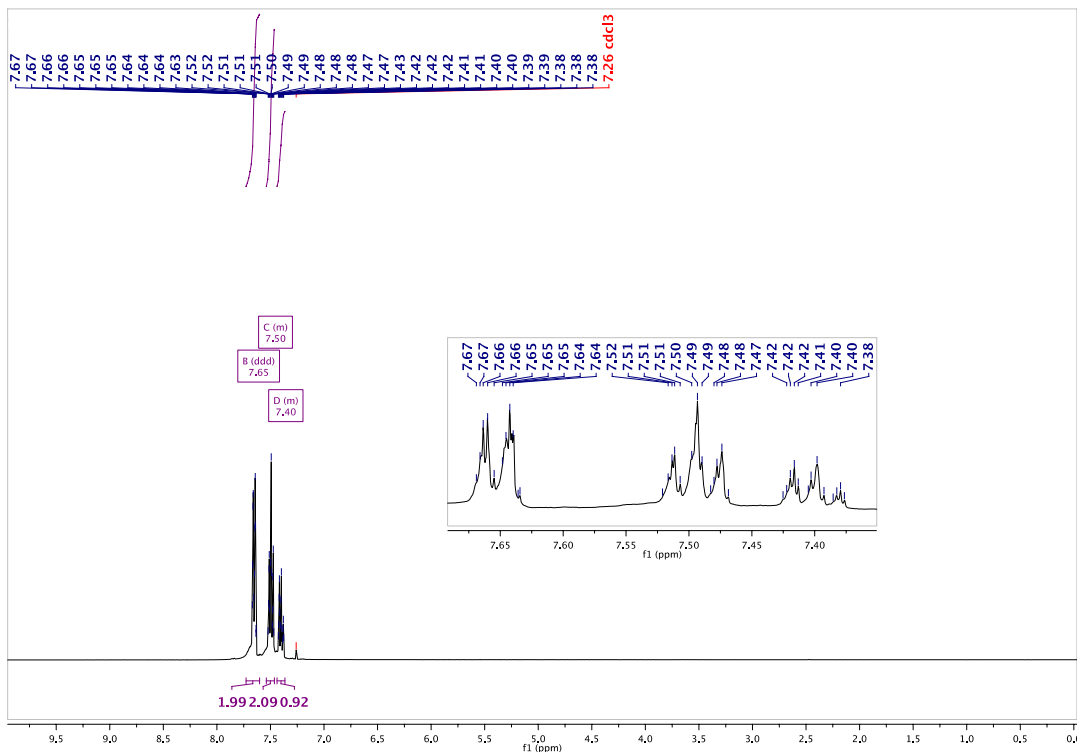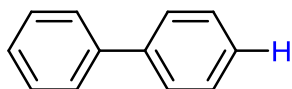

**Biphenyl**  
(Table 1, entry 1f) <sup>13</sup>C-NMR

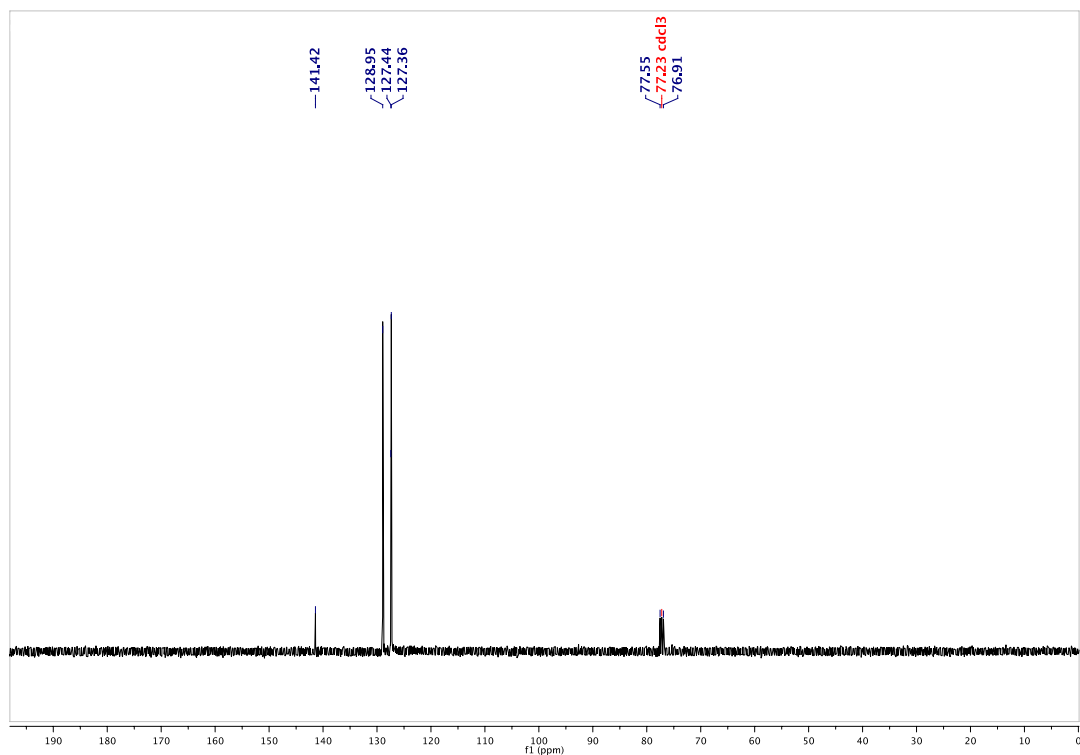



**4-Cyanobiphenyl**  
(Table 1, entry 1g)  $^1\text{H-NMR}$

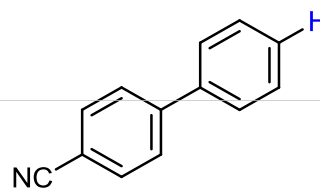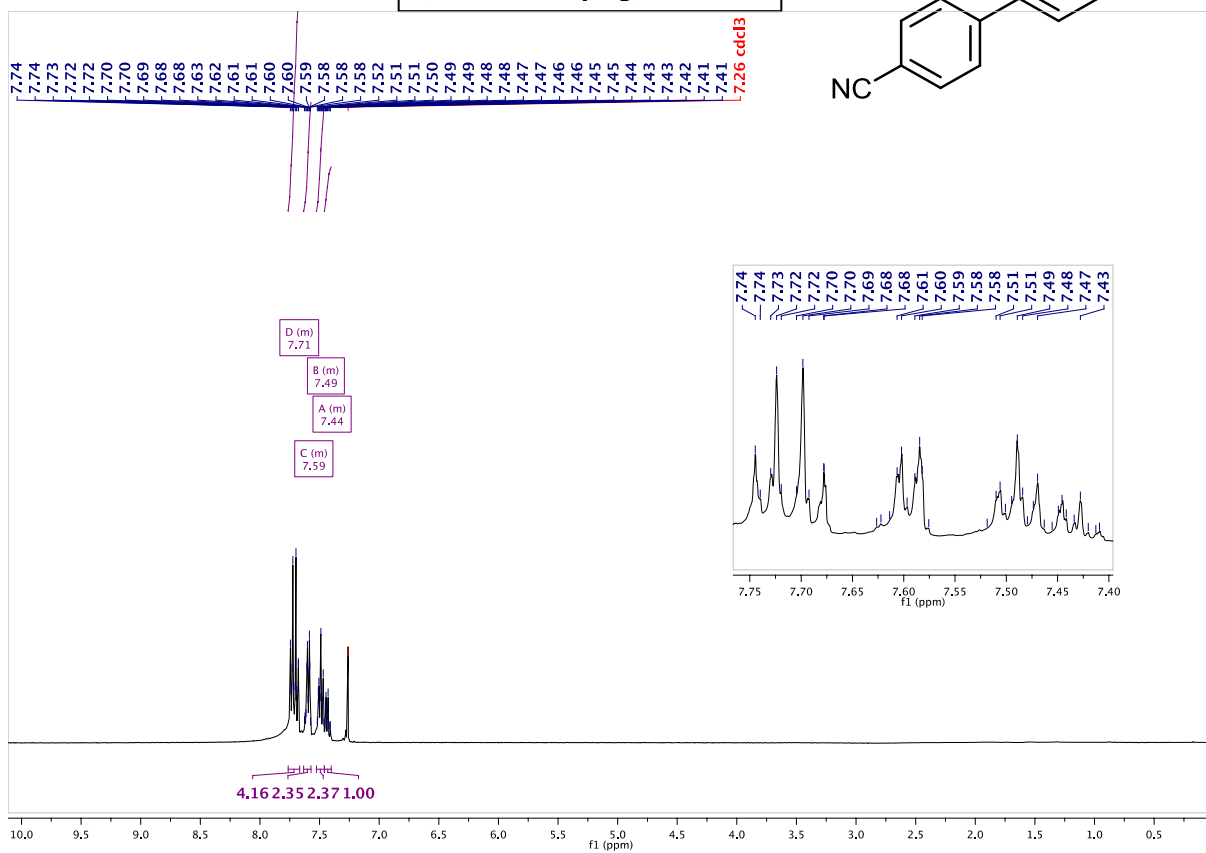

**4-Cyanobiphenyl**  
(Table 1, entry 1g)  $^{13}\text{C-NMR}$

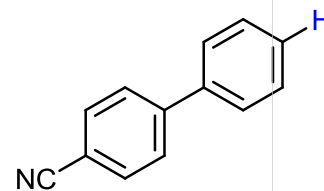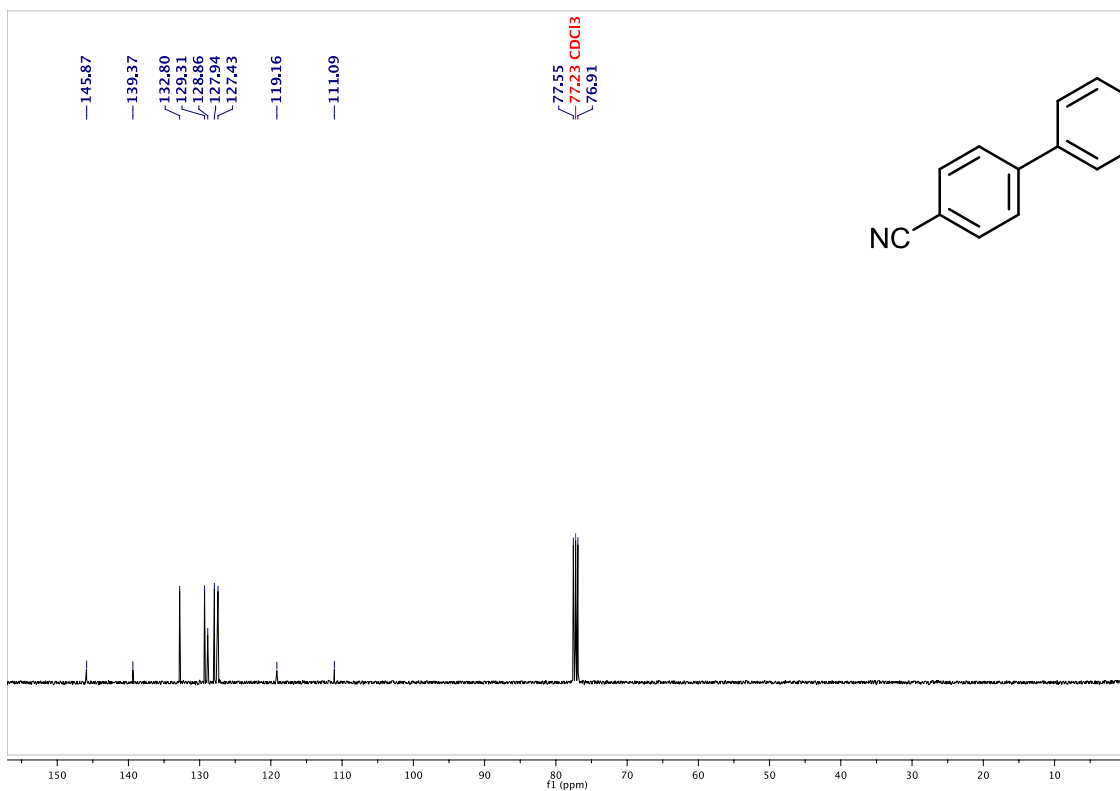

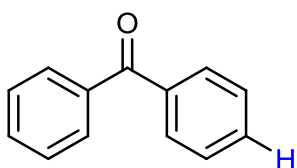

**Benzophenone**  
(Table 1, entry 1i)  $^1\text{H-NMR}$

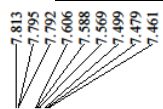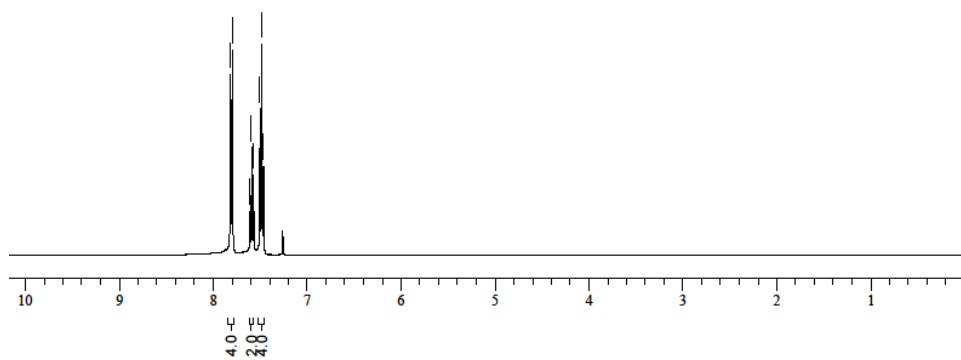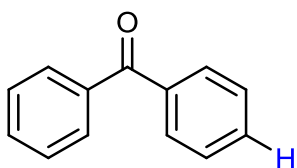

**Benzophenone**  
(Table 1, entry 1i)  $^{13}\text{C-NMR}$

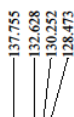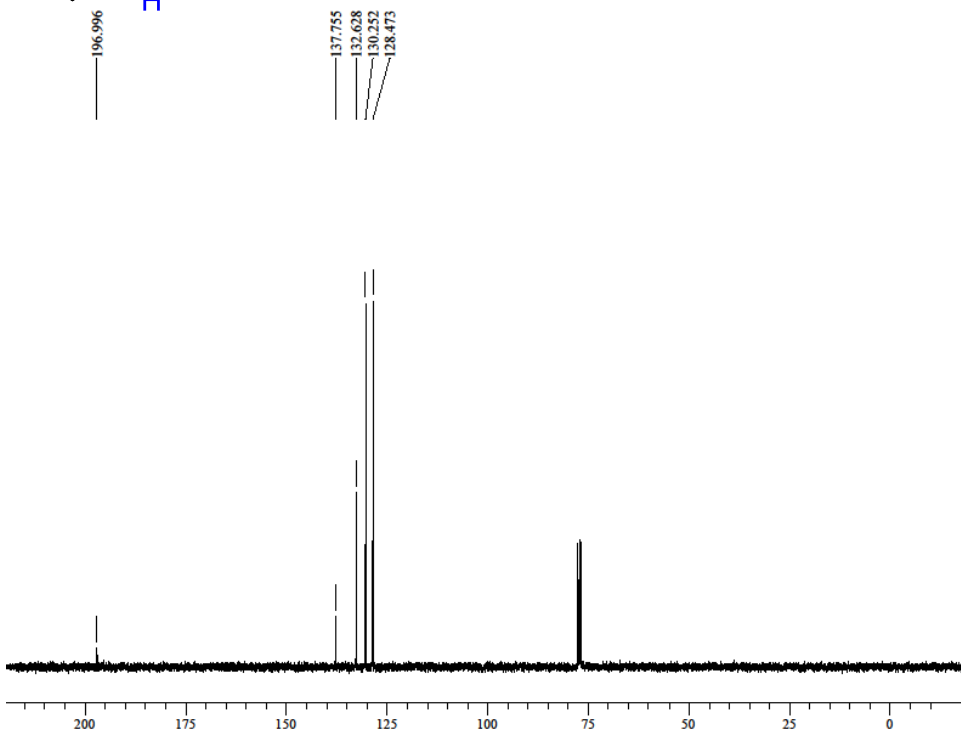

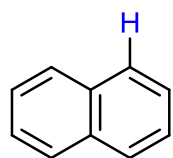

**1-Methoxynaphthalene**  
(Table 1, entry 1j) <sup>1</sup>H-NMR

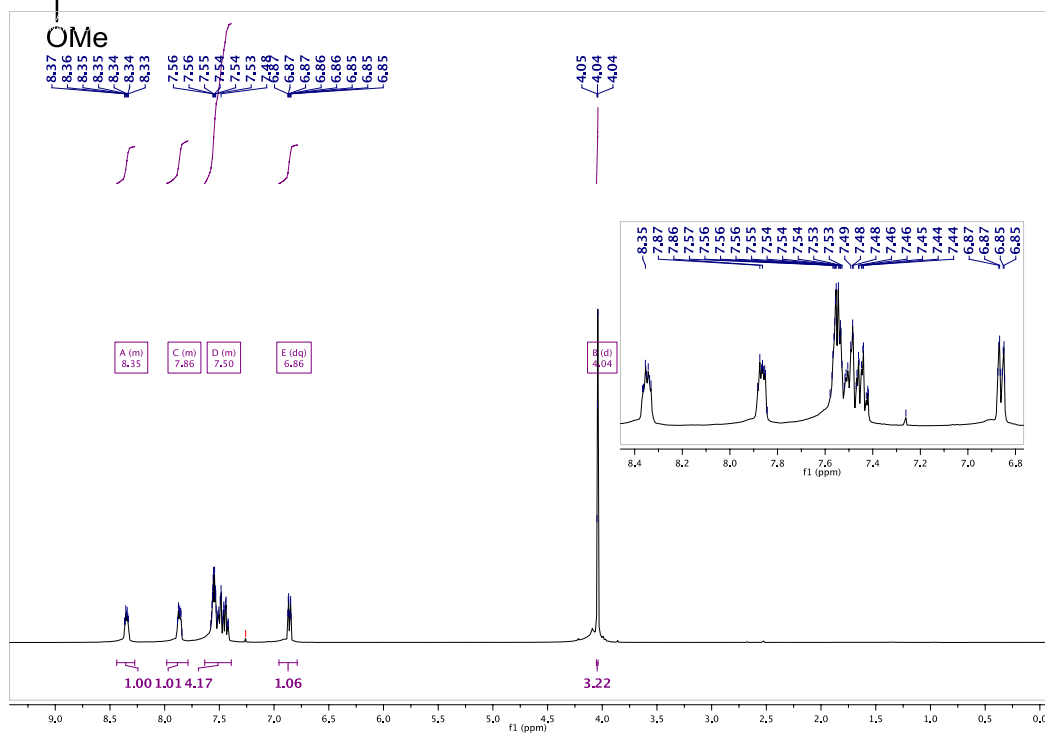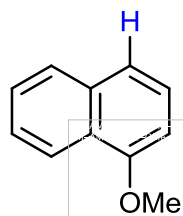

**1-Methoxynaphthalene**  
(Table 1, entry 1j) <sup>13</sup>C-NMR

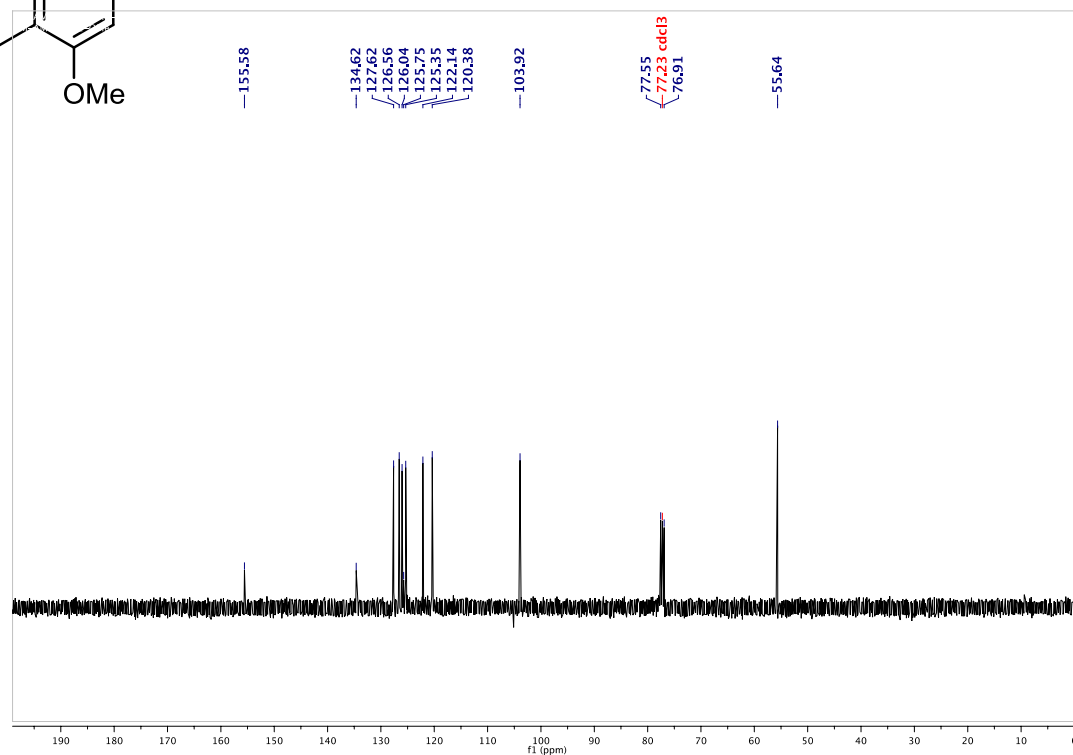

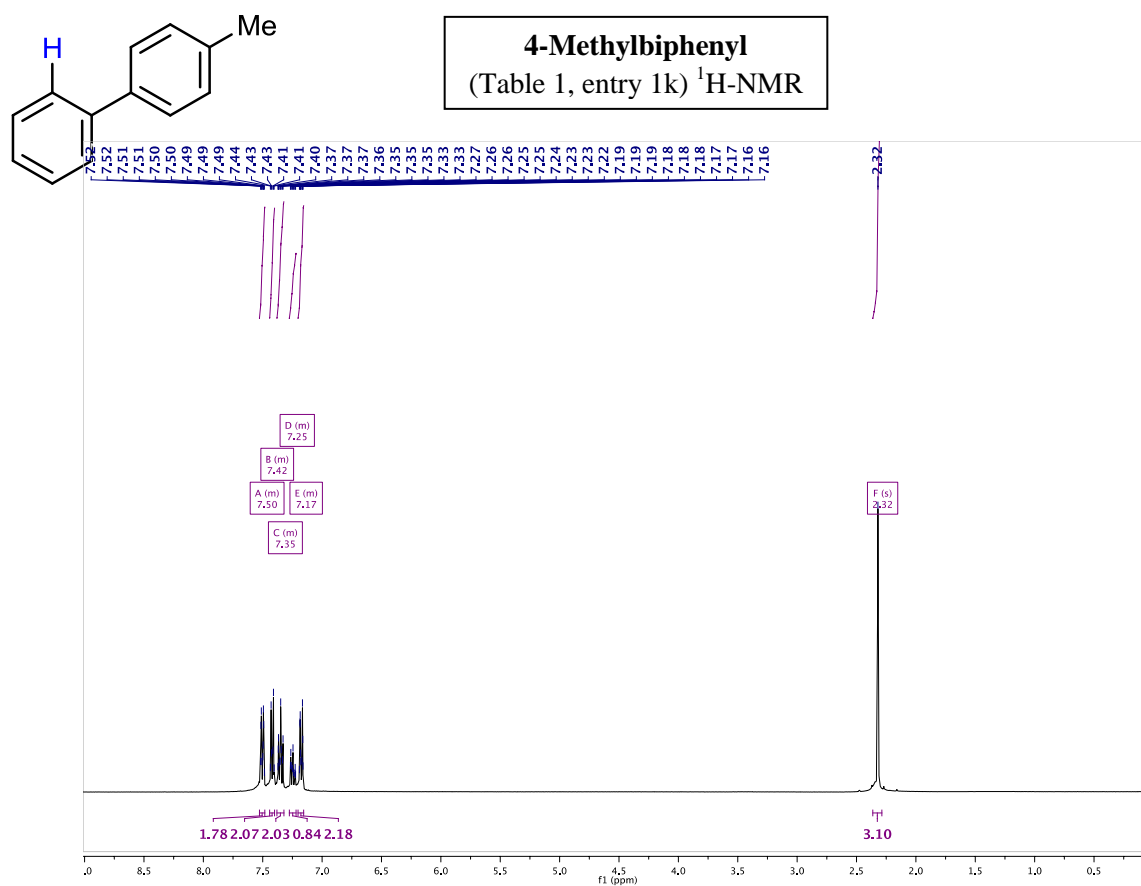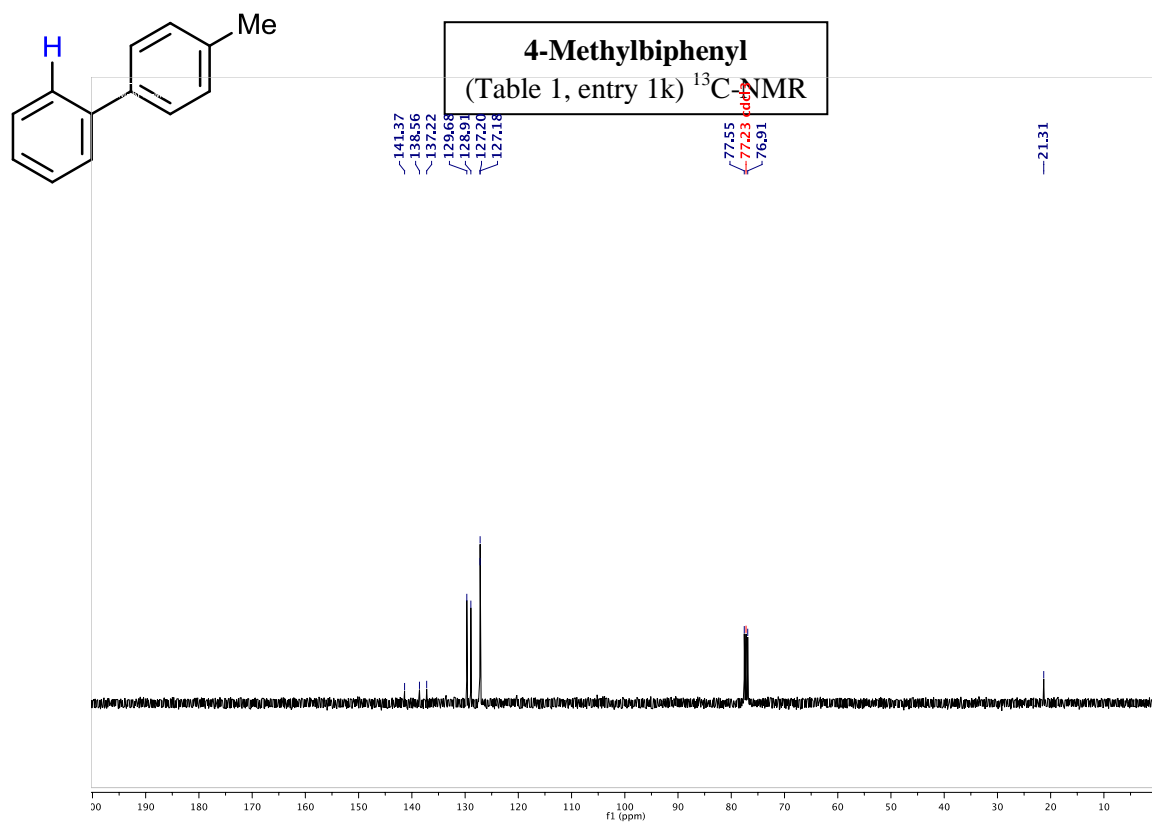

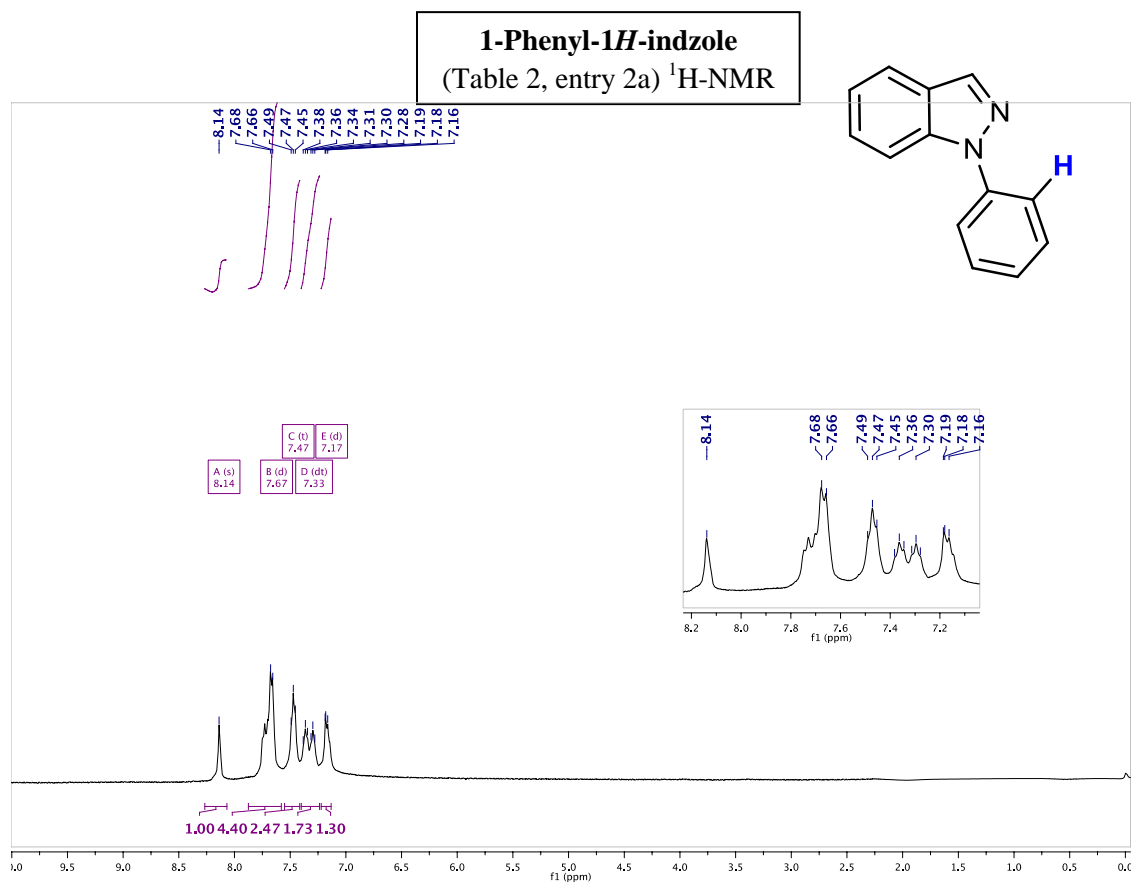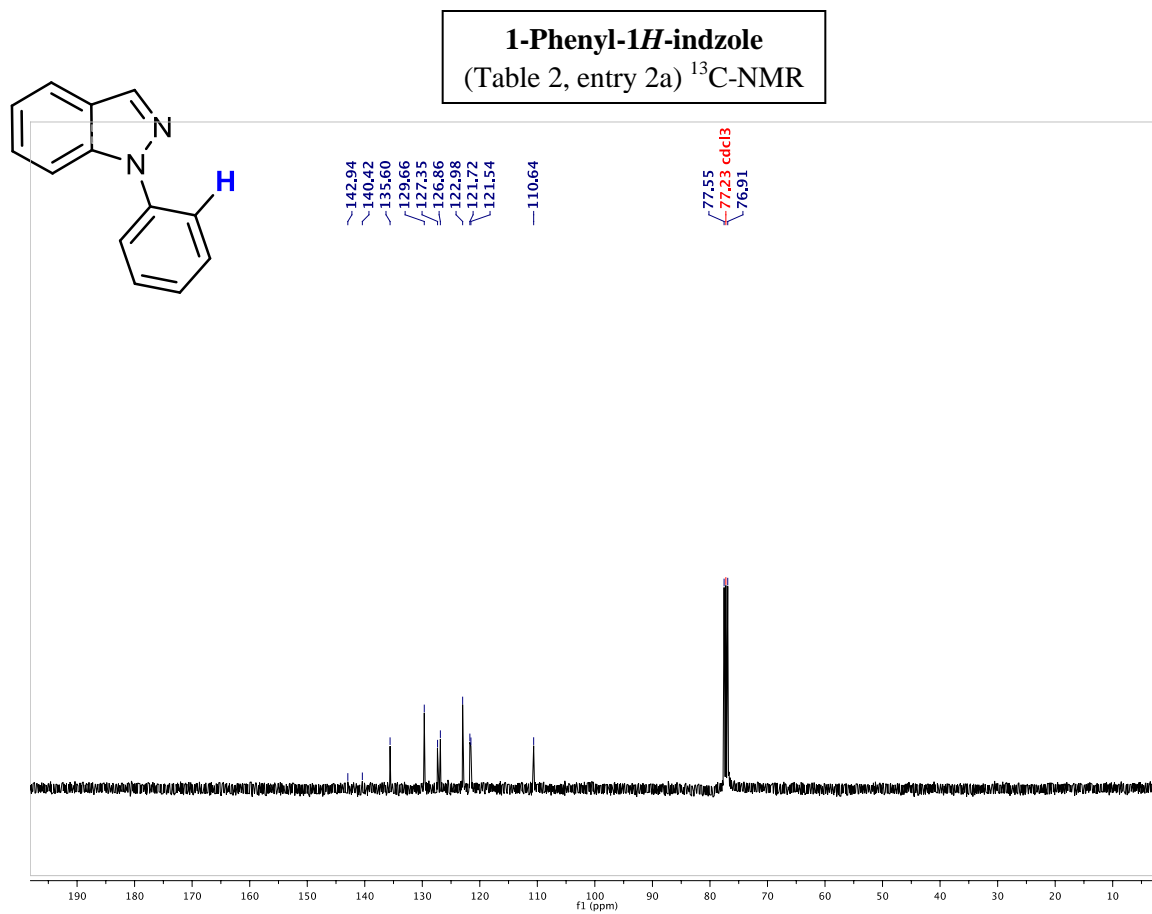

**1,3-Diphenyl-1H-pyrazole**  
(Table 2, entry 2b) <sup>1</sup>H-NMR

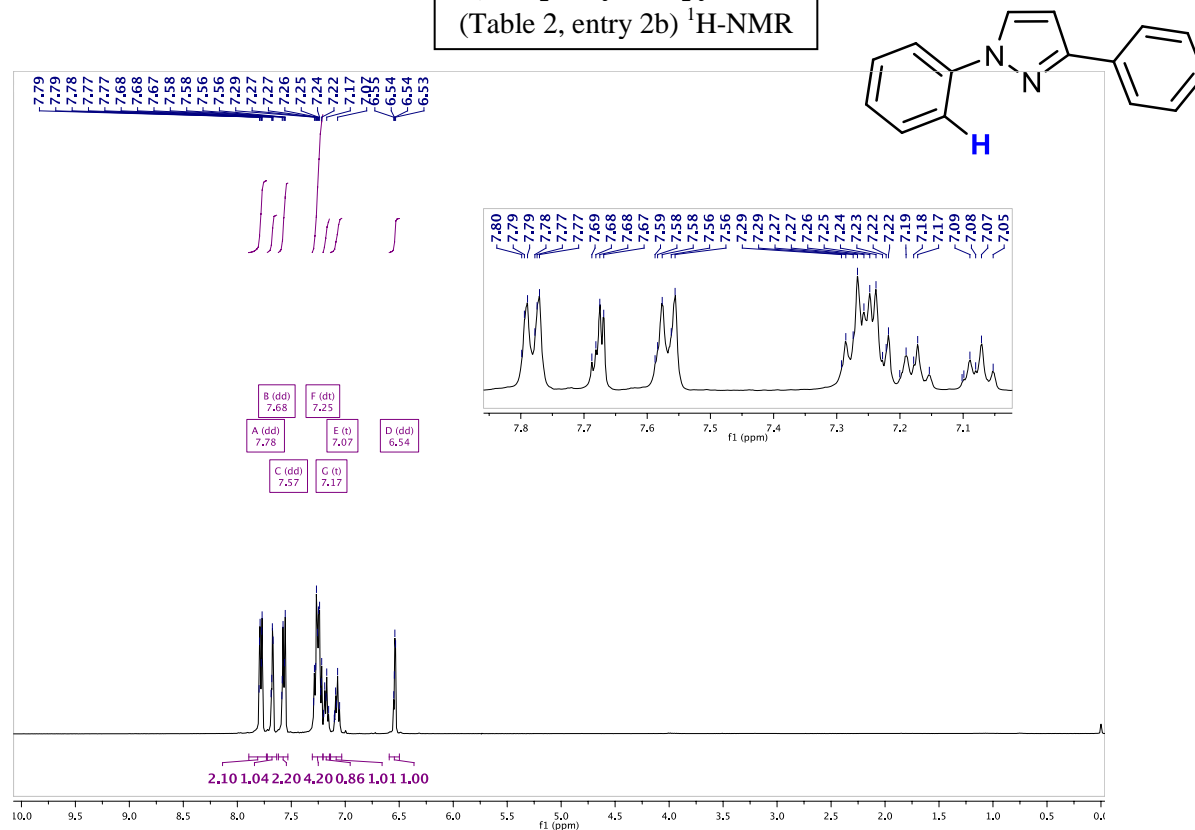

**1,3-Diphenyl-1H-pyrazole**  
(Table 2, entry 2b) <sup>13</sup>C-NMR

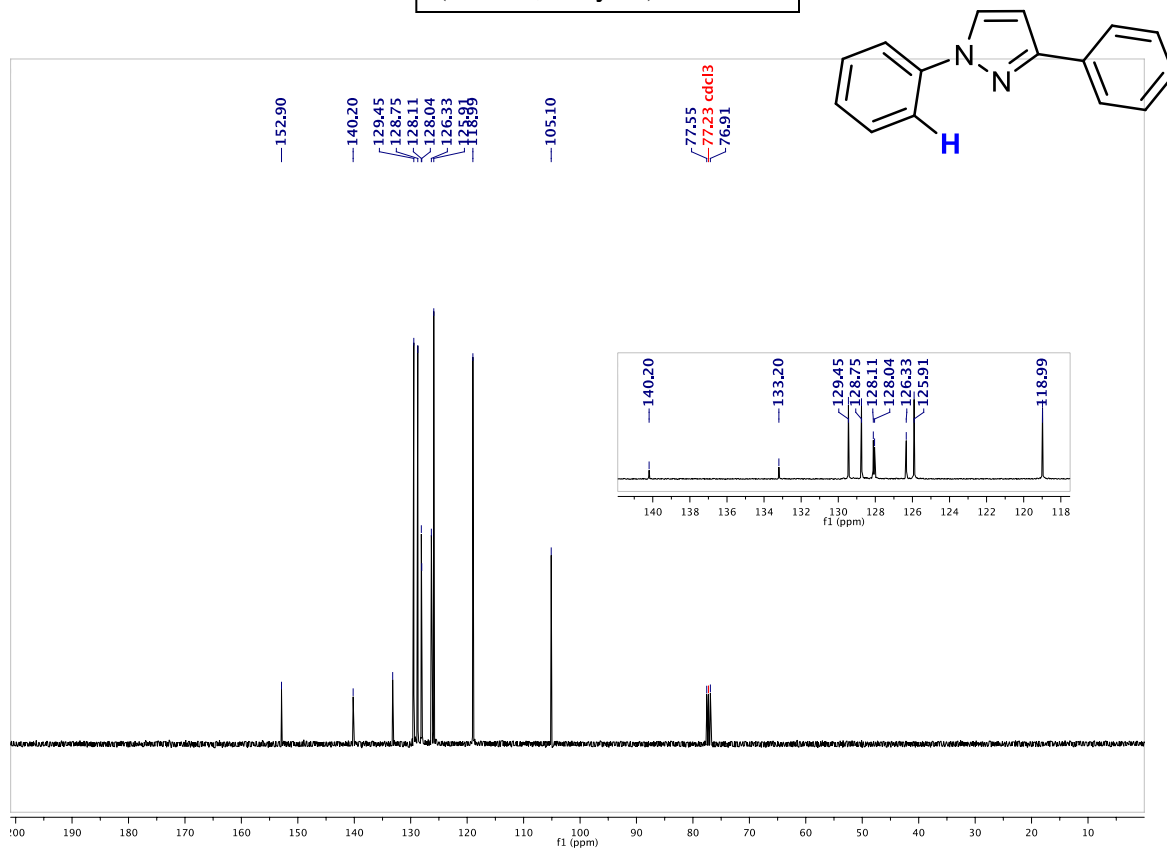

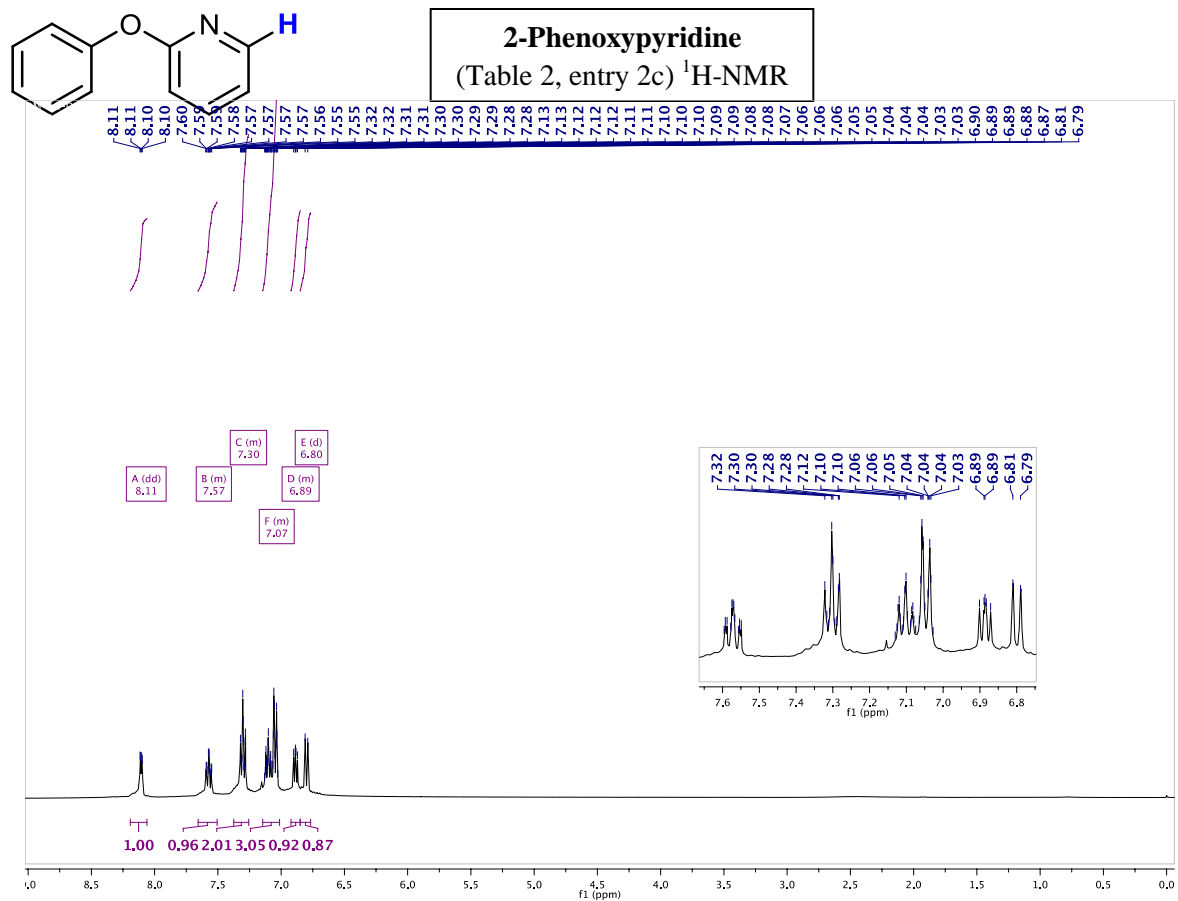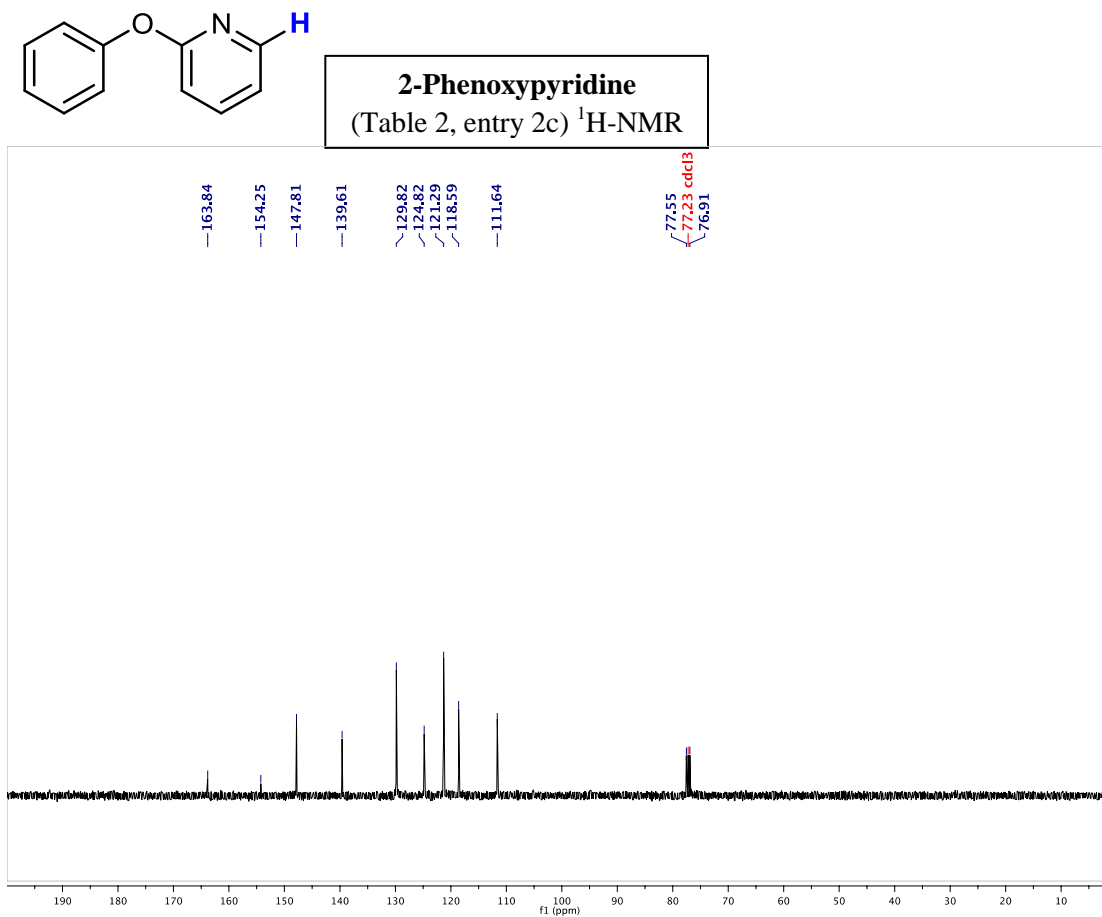

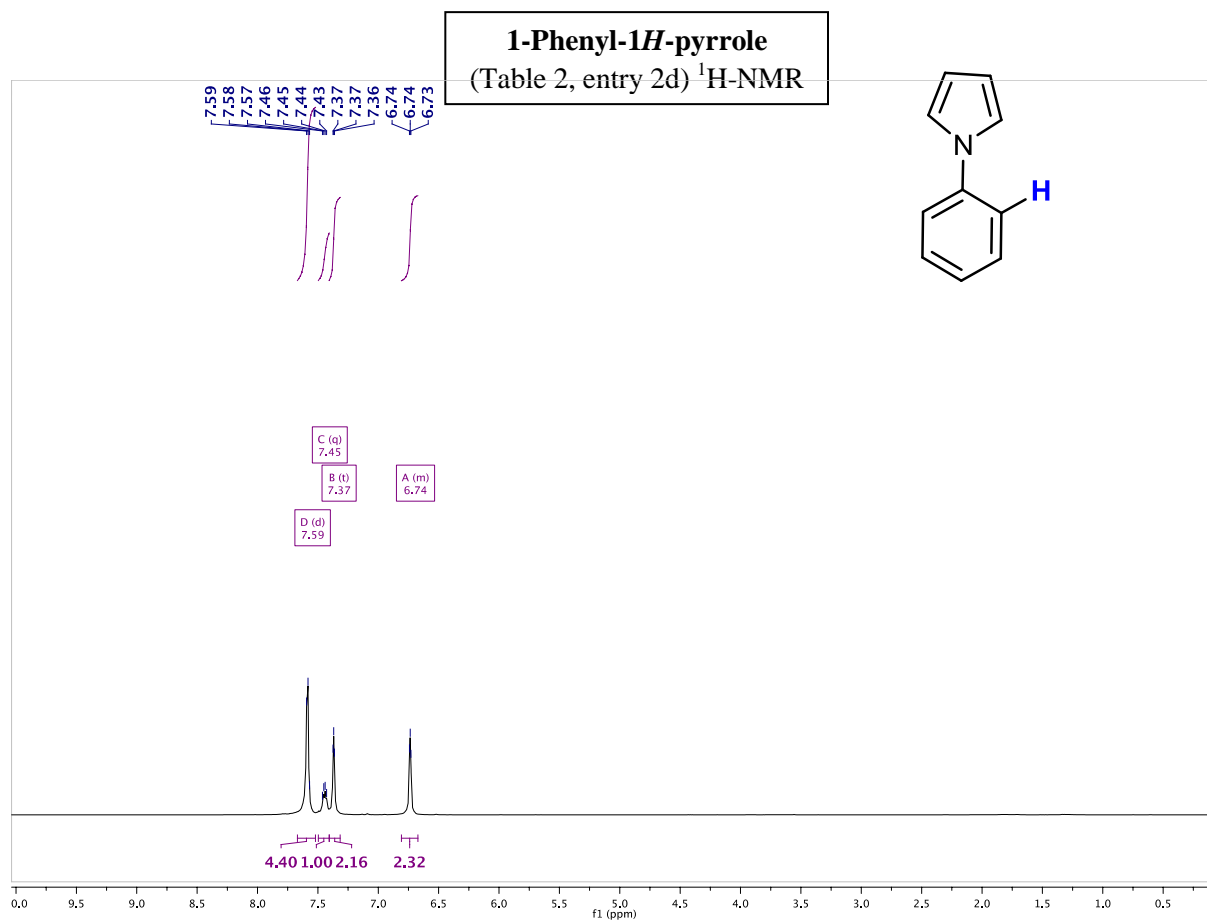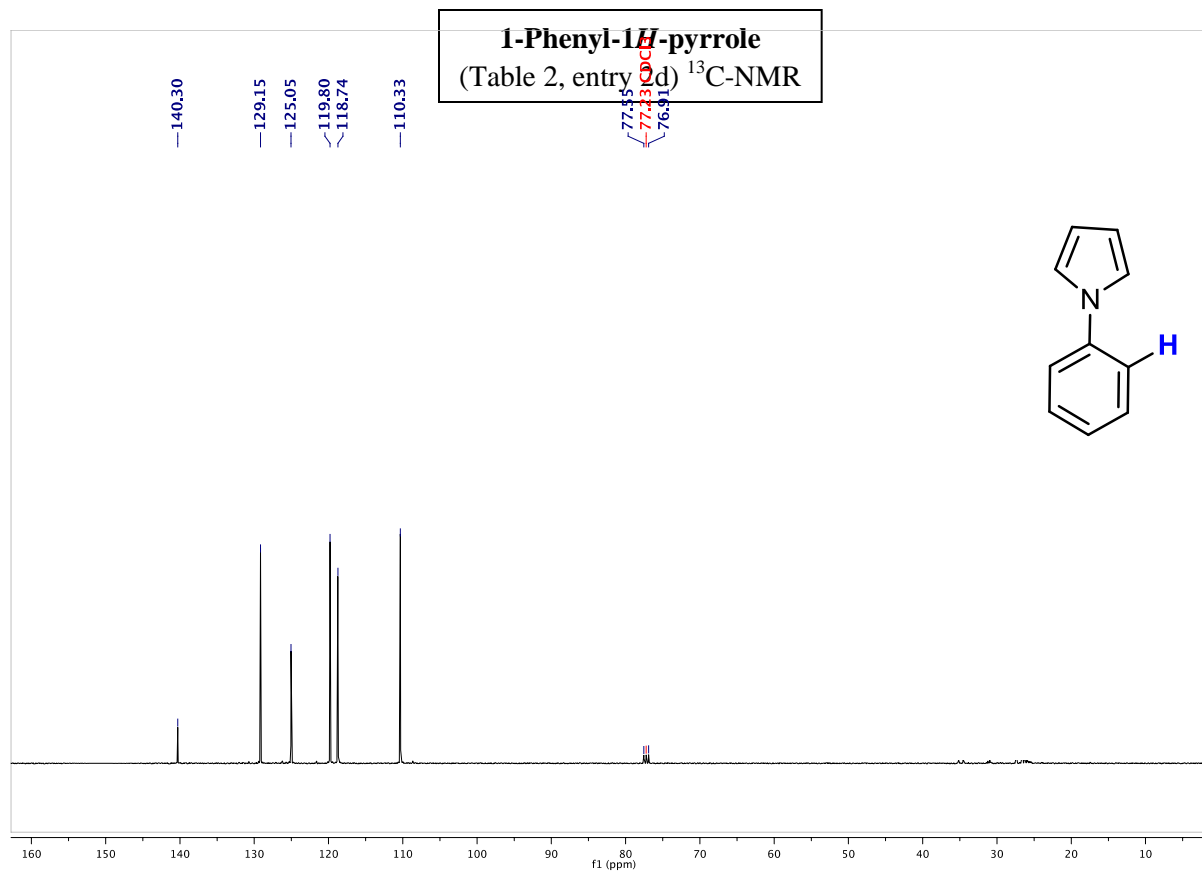



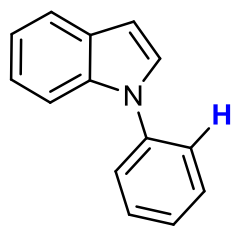

**1-Phenyl-1H-indole**  
(Table 2, entry 2e) <sup>1</sup>H-NMR

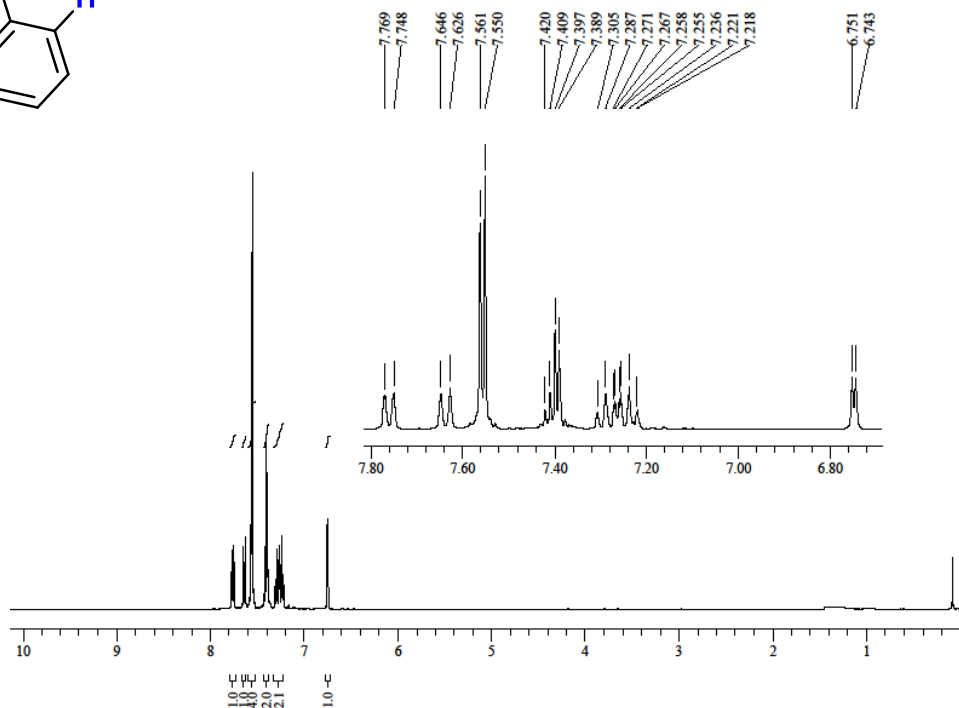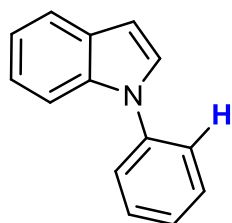

**1-Phenyl-1H-indole**  
(Table 2, entry 2e) <sup>13</sup>C-NMR

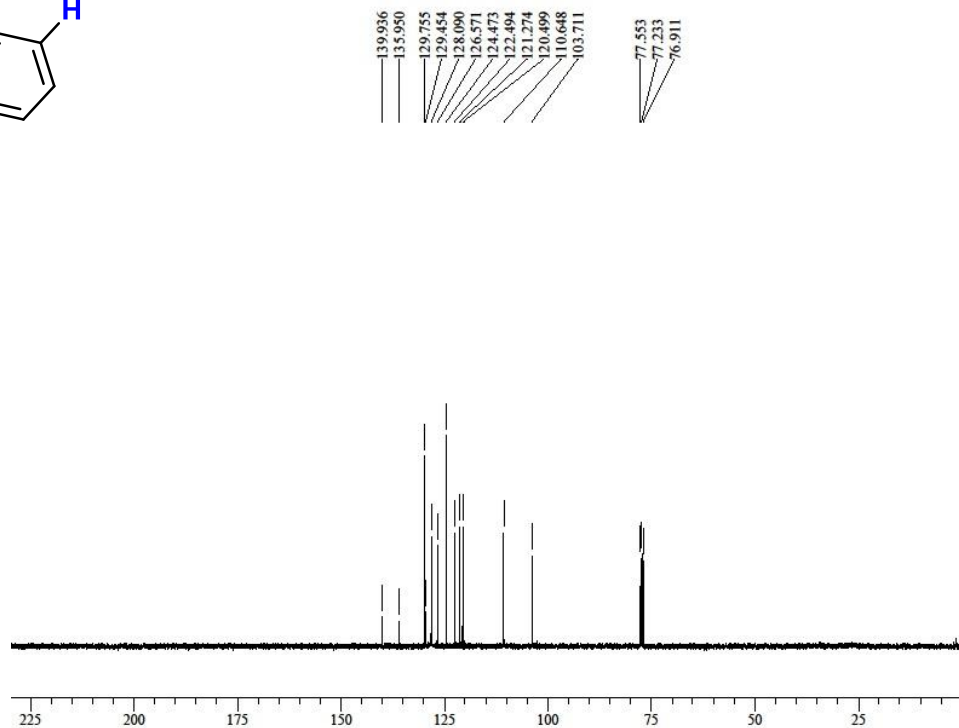

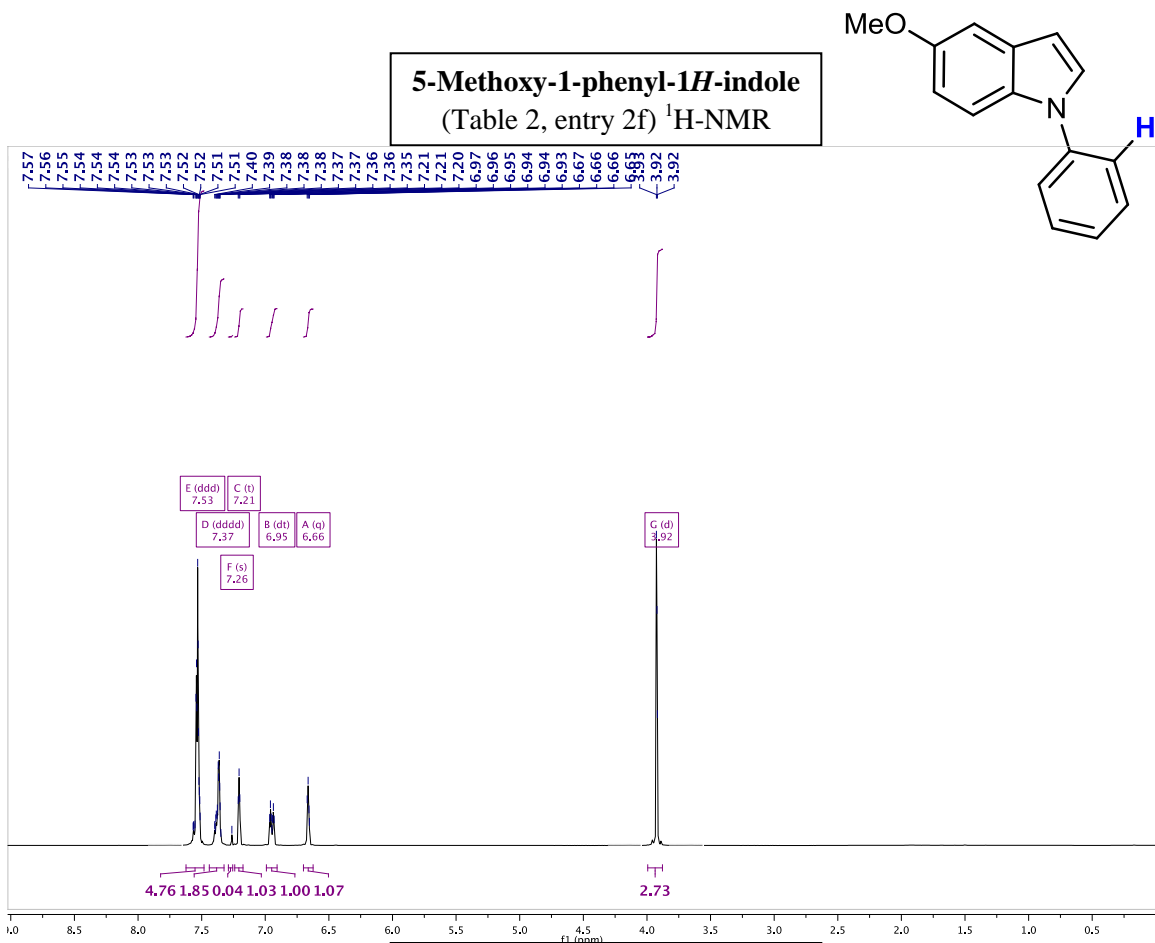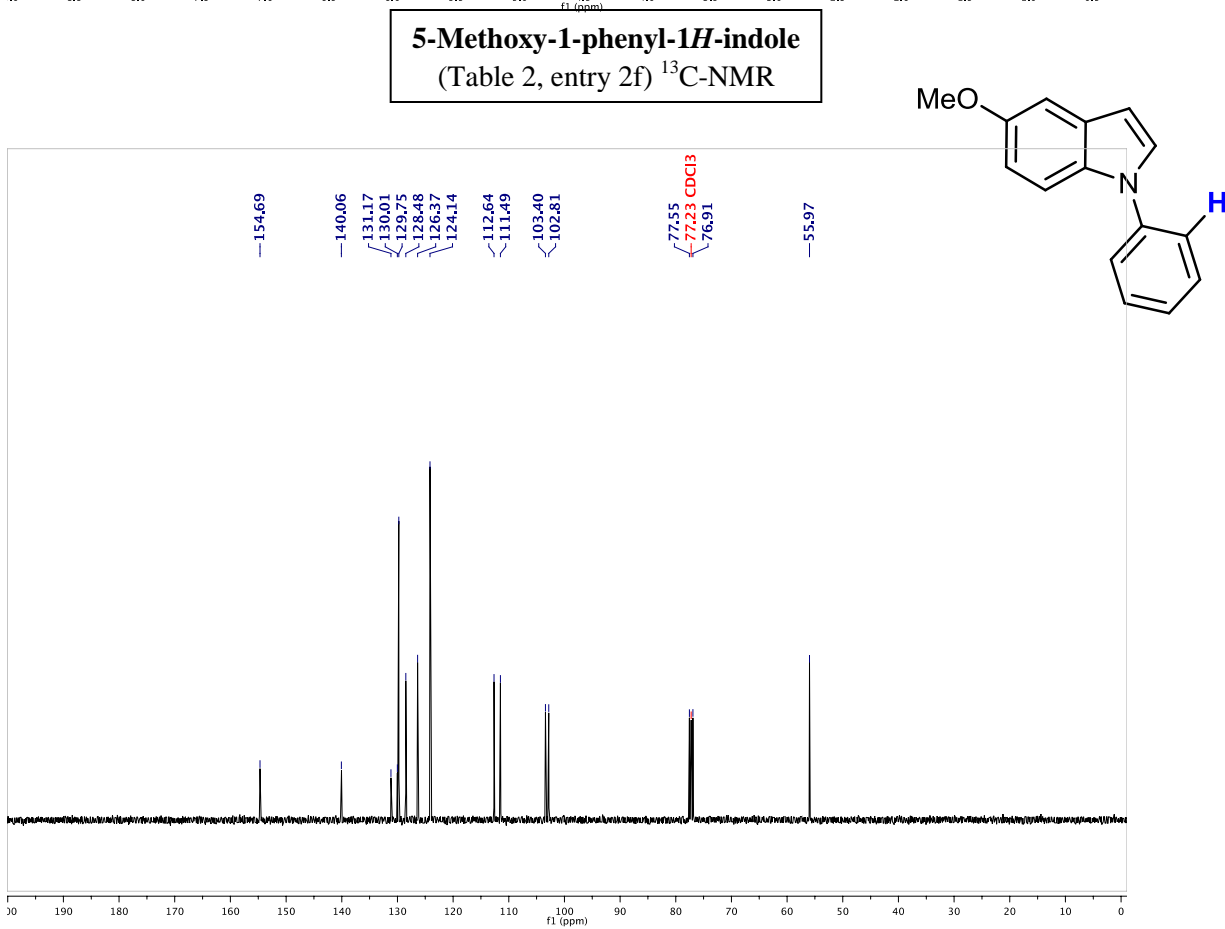

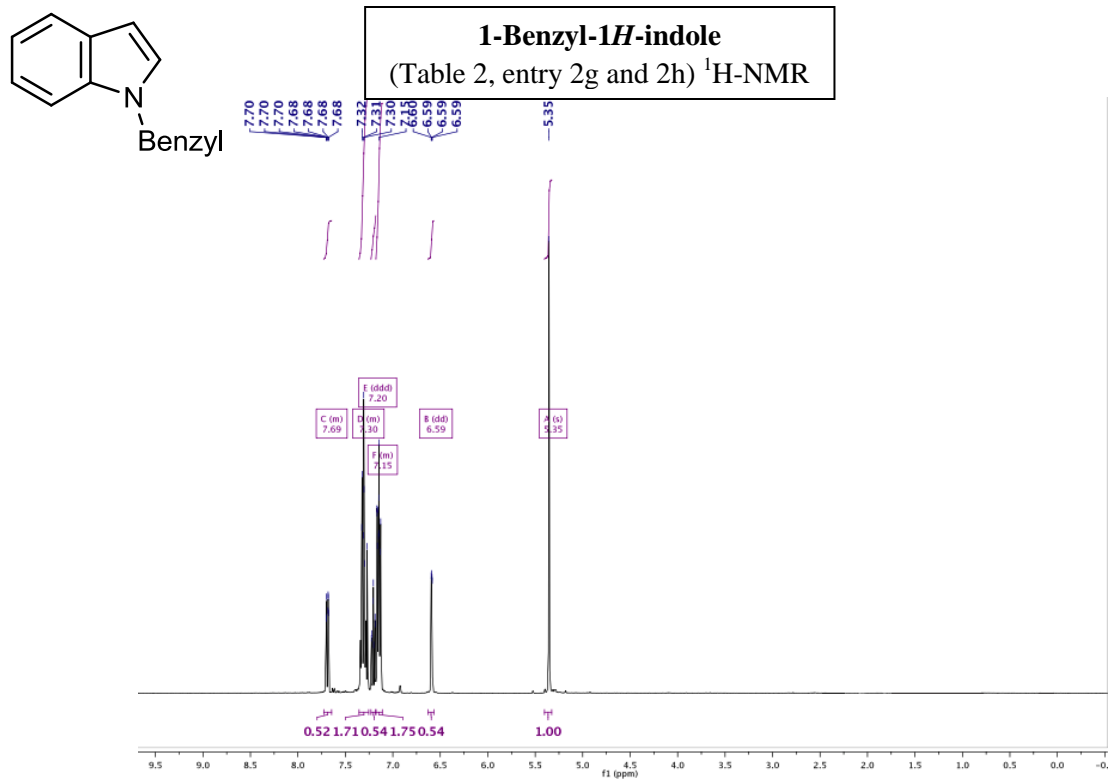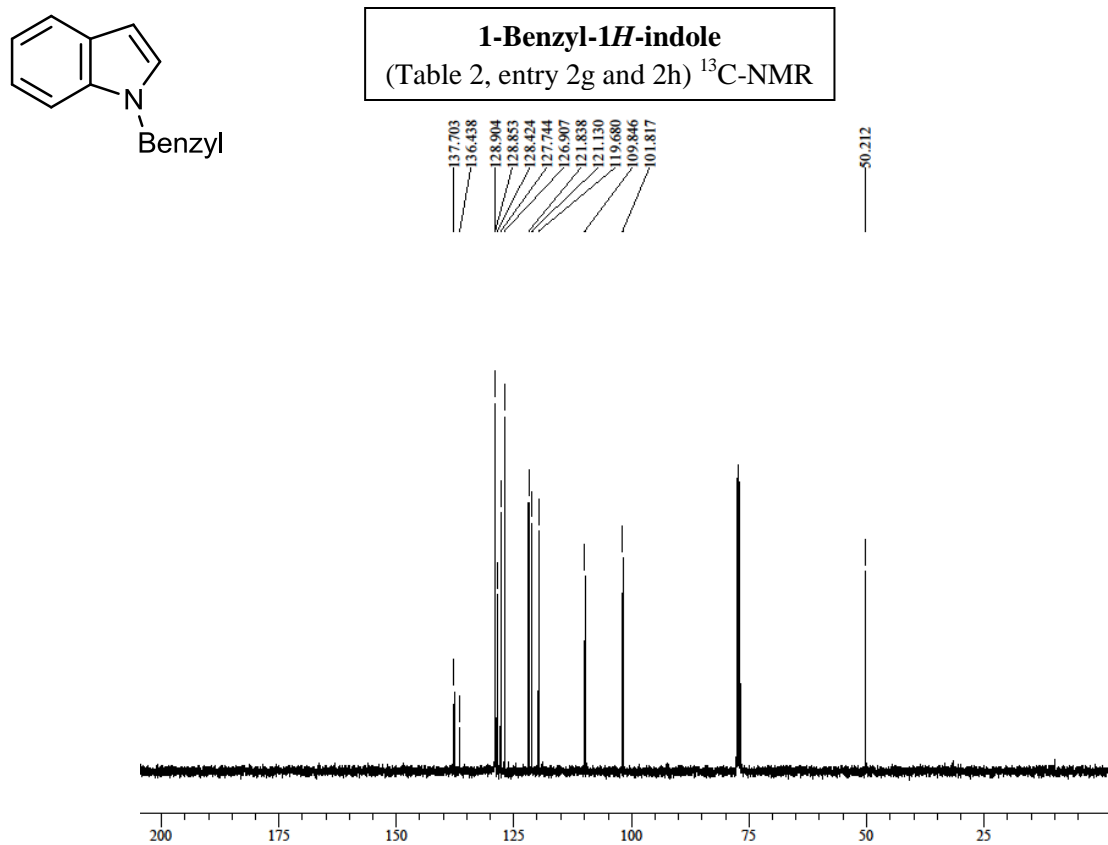

**4-Ethyl-2-phenyl-4,5-dihydrooxazole**  
(Table 2, entry 2i and 2j)  $^1\text{H-NMR}$

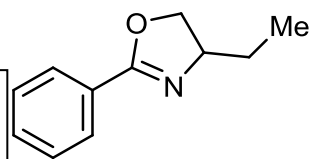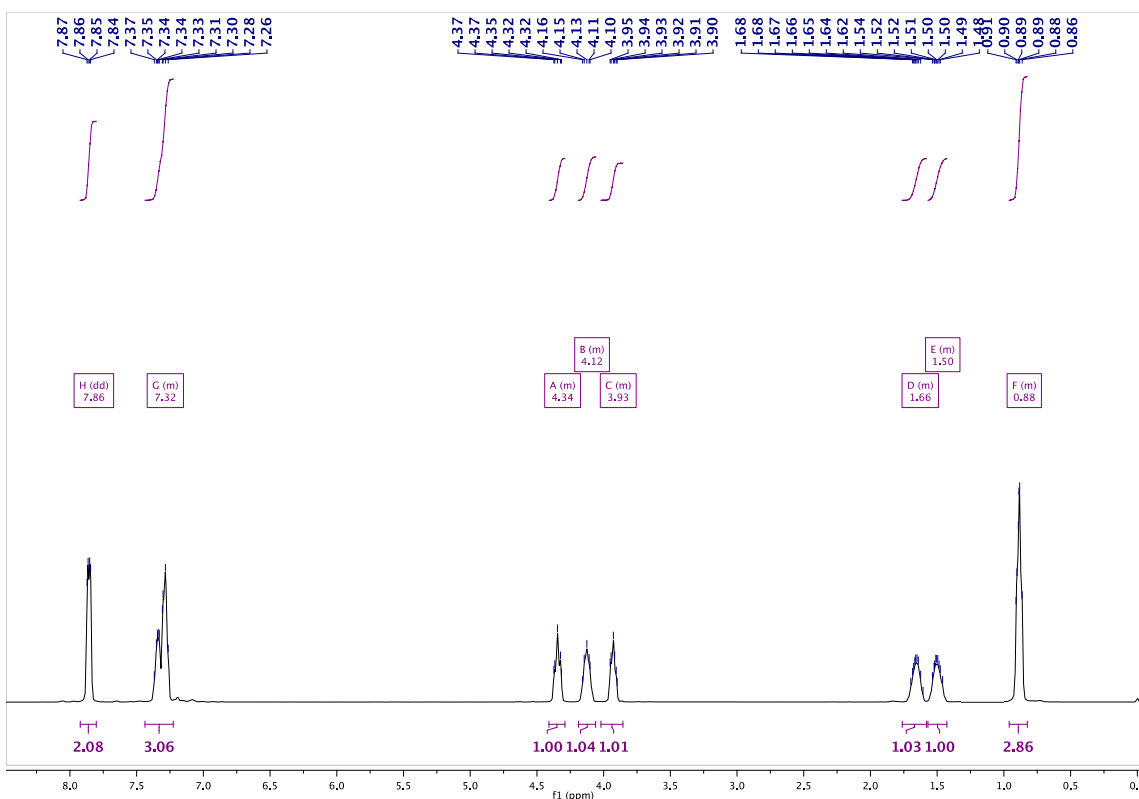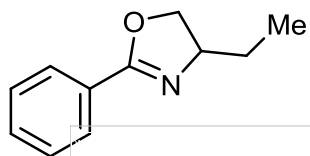

**4-Ethyl-2-phenyl-4,5-dihydrooxazole**  
(Table 2, entry 2i and 2j)  $^{13}\text{C-NMR}$

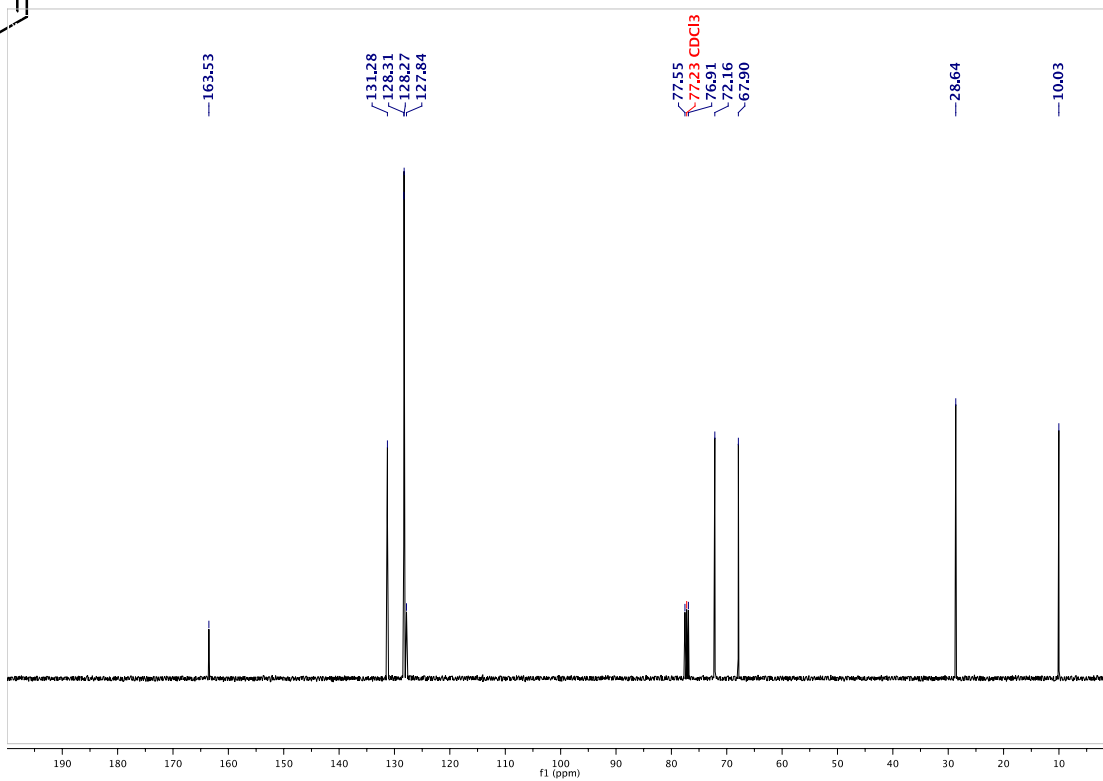

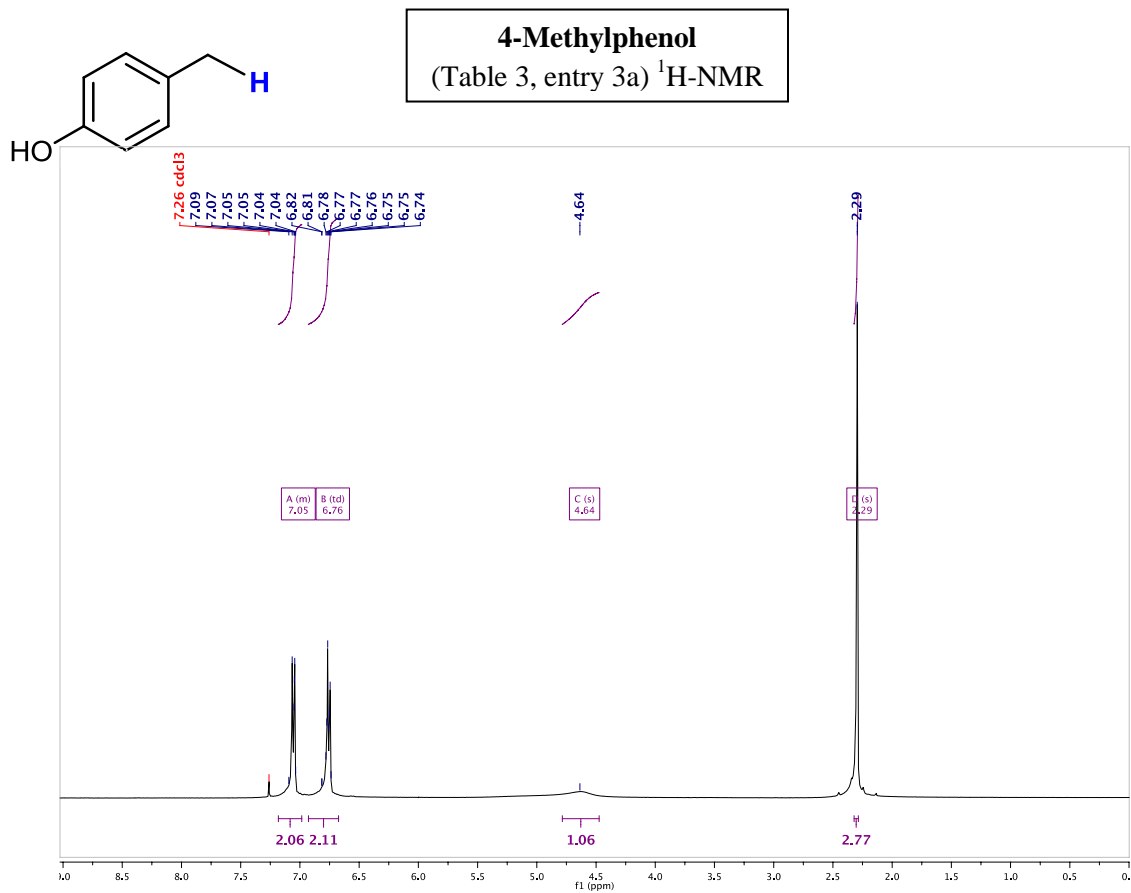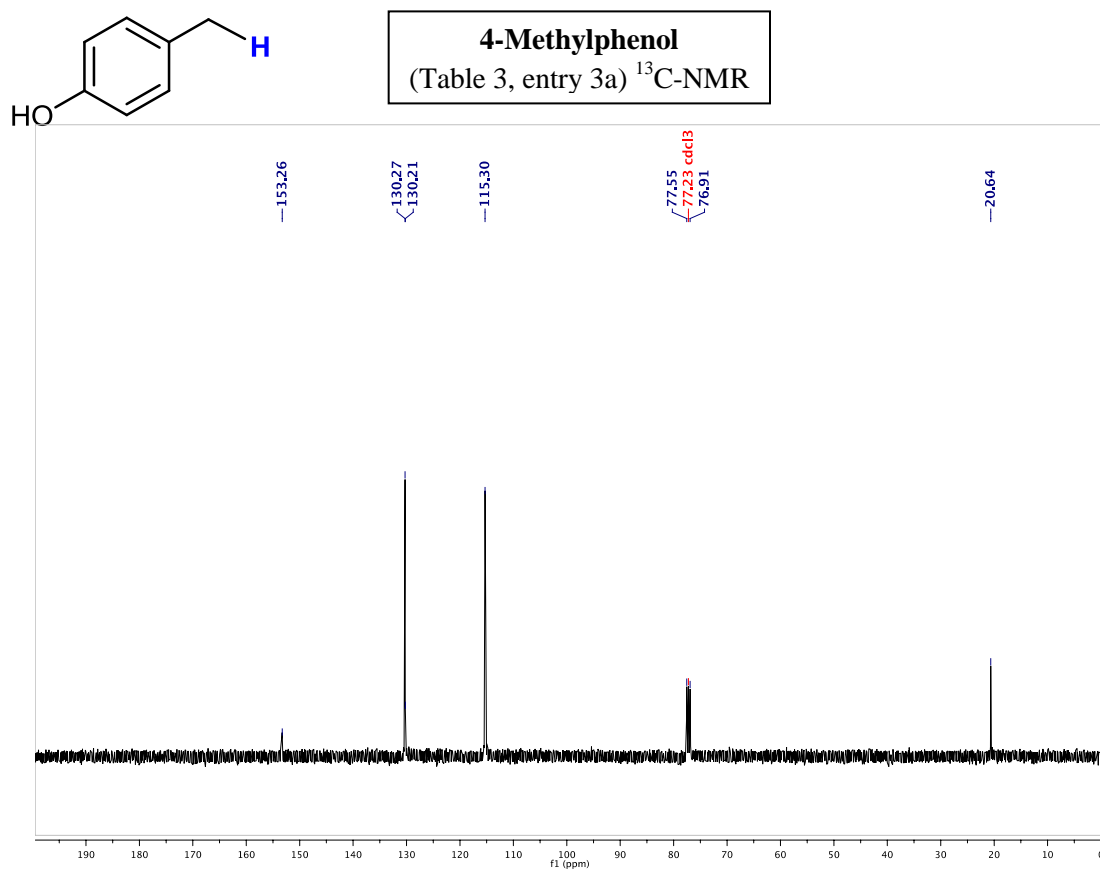

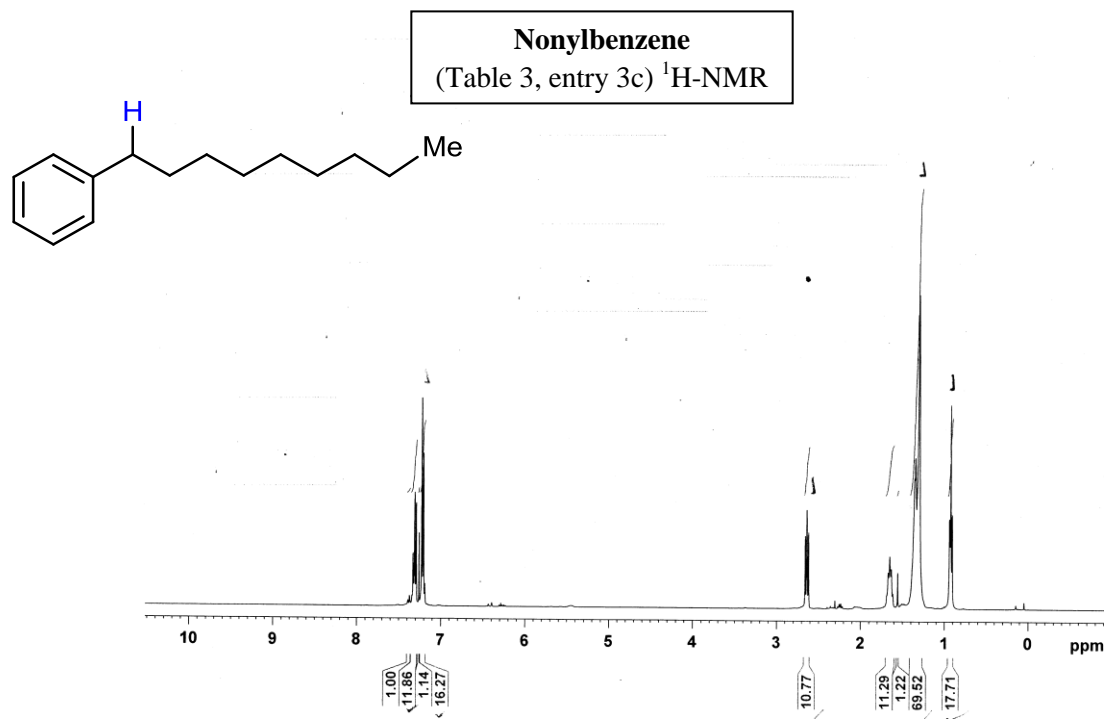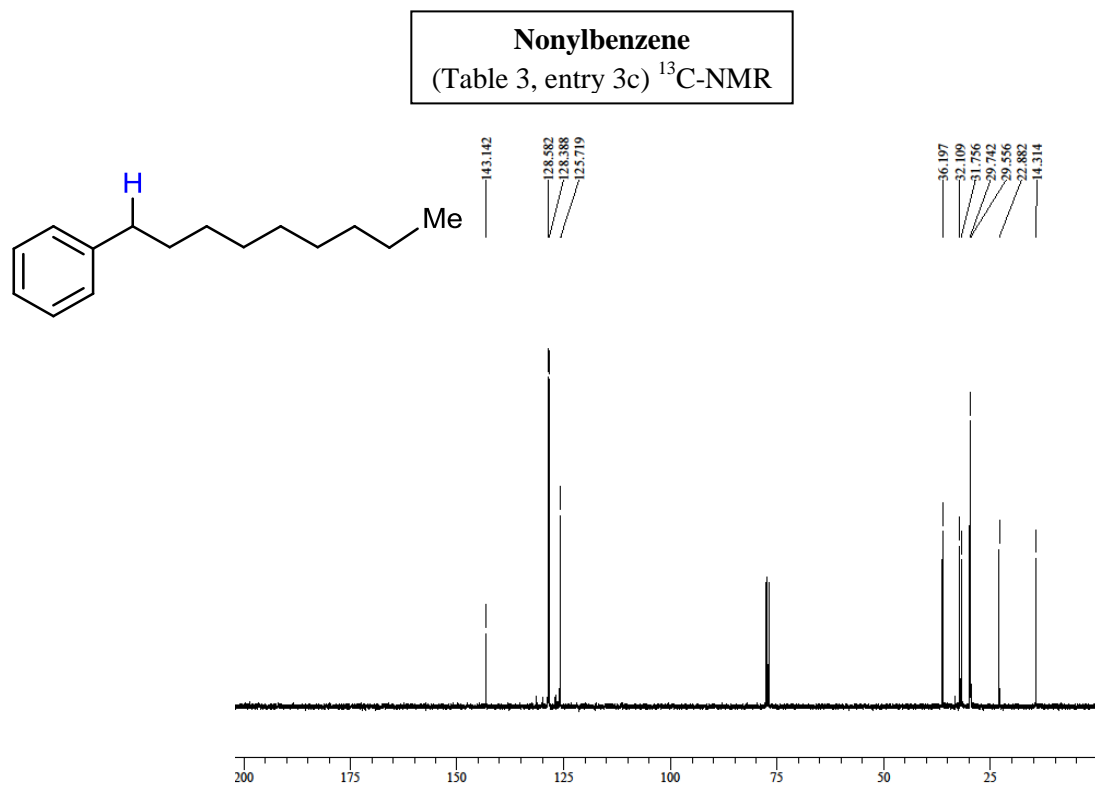

**1-Ethynaphthalene**  
(Table 3, entry 3e) <sup>1</sup>H-NMR

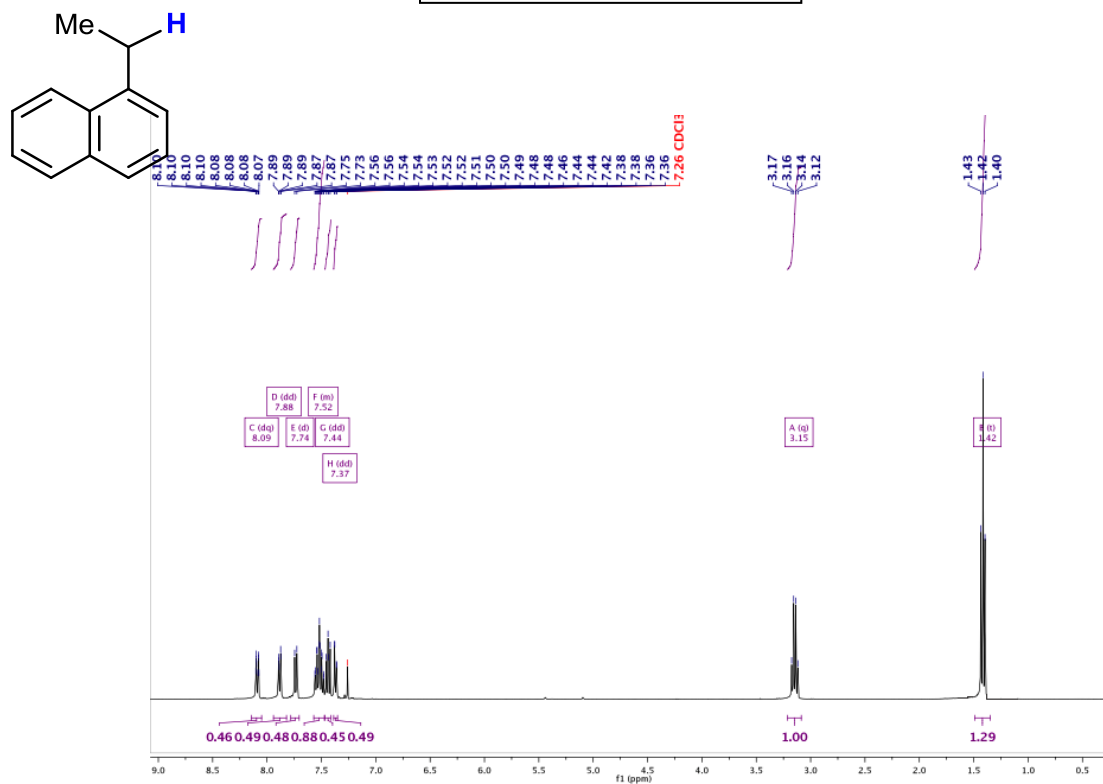

**1-Ethynaphthalene**  
(Table 3, entry 3e) <sup>13</sup>C-NMR

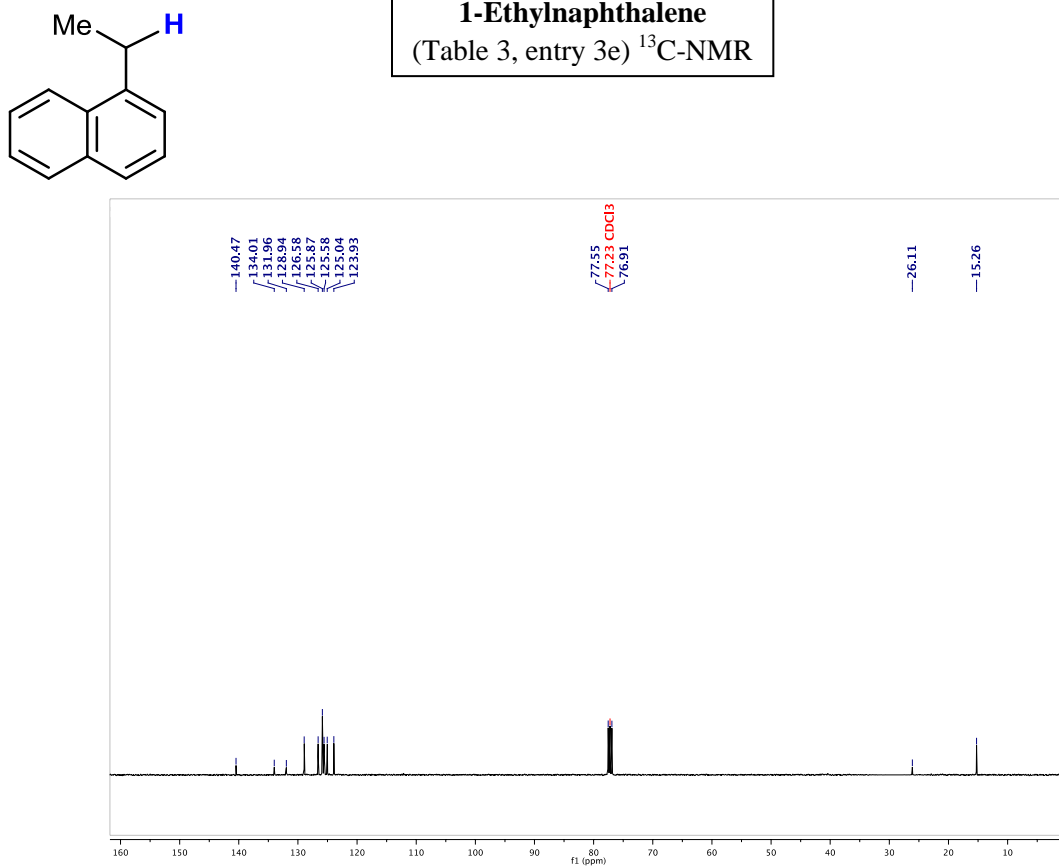

**Undecane**  
(Table 3, entry 3f)  $^1\text{H-NMR}$

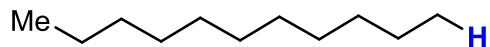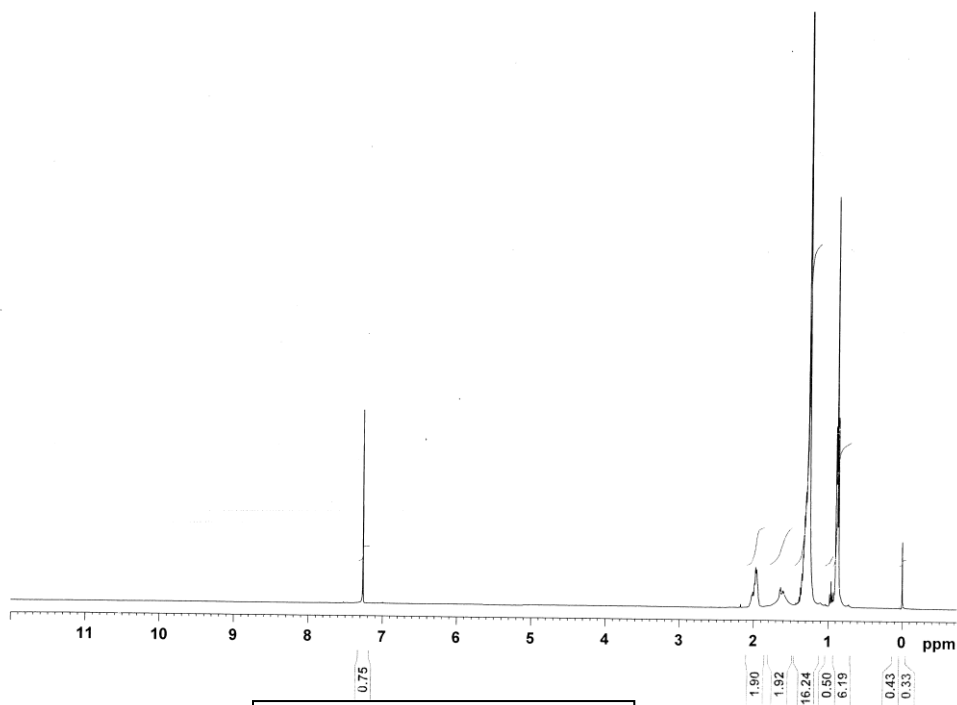

**Undecane**  
(Table 3, entry 3f)  $^{13}\text{C-NMR}$

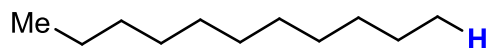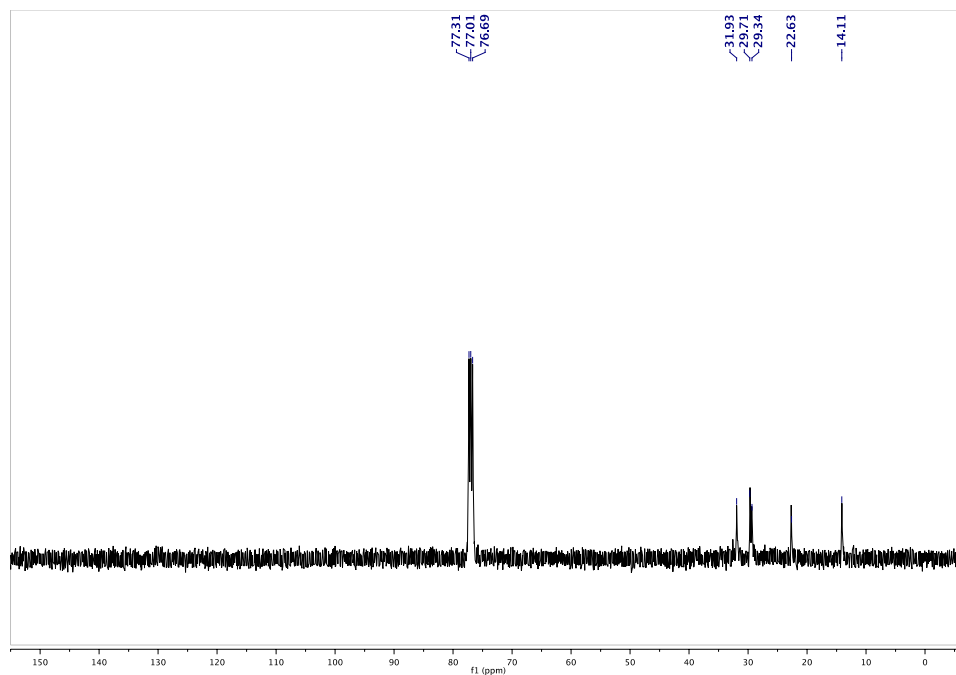

Supplement: c2cc36883h_2.pdf [file c2cc36883h_2.pdf]
